## **Loss of cytoplasmic incompatibility and minimal fecundity effects explain relatively low *Wolbachia* frequencies in *Drosophila mauritiana***

Megan K. Meany<sup>1</sup>, William R. Conner<sup>1</sup>, Sophia V. Richter<sup>1</sup>, Jessica A. Bailey<sup>1</sup>, Michael Turelli<sup>2</sup> and Brandon S. Cooper<sup>1¶</sup>

<sup>1</sup>Division of Biological Sciences, University of Montana, Missoula, MT USA

<sup>2</sup>Department of Evolution and Ecology, University of California, Davis, CA USA

Correspondence:

¶Division of Biological Sciences

University of Montana

32 Campus Drive, ISB

Missoula, MT 59812, USA

Email: [brandon.cooper@umontana.edu](mailto:brandon.cooper@umontana.edu)

**RUNNING TITLE:** *w*Mau *Wolbachia* in *Drosophila mauritiana*

### **KEYWORDS**

host-microbe interactions, introgression, maternal transmission, mitochondria, spatial spread, WO phage

## ABSTRACT

Maternally transmitted *Wolbachia* bacteria infect about half of all insect species. Many *Wolbachia* cause cytoplasmic incompatibility (CI), reduced egg hatch when uninfected females mate with infected males. Although CI produces a frequency-dependent fitness advantage that leads to high equilibrium *Wolbachia* frequencies, it does not aid *Wolbachia* spread from low frequencies. Indeed, the fitness advantages that produce initial *Wolbachia* spread and maintain non-CI *Wolbachia* remain elusive. *wMau* *Wolbachia* infecting *Drosophila mauritiana* do not cause CI, despite being very similar to CI-causing *wNo* from *D. simulans* (0.068% sequence divergence over 682,494 bp), suggesting recent CI loss. Using draft *wMau* genomes, we identify a deletion in a CI-associated gene, consistent with theory predicting that selection within host lineages does not act to increase or maintain CI. In the laboratory, *wMau* shows near-perfect maternal transmission; but we find no significant effect on host fecundity, in contrast to published data. Intermediate *wMau* frequencies on the island Mauritius are consistent with a balance between unidentified small, positive fitness effects and imperfect maternal transmission. Our phylogenomic analyses suggest that group-B *Wolbachia*, including *wMau* and *wPip*, diverged from group-A *Wolbachia*, such as *wMel* and *wRi*, 6–46 million years ago, more recently than previously estimated.

## INTRODUCTION

1 Maternally transmitted *Wolbachia* infect about half of all species throughout all major insect  
2 orders (Werren and Windsor 2000; Zug and Hammerstein 2012; Weinert et al. 2015), as well as  
3 other arthropods (Jeyaprakash and Hoy 2000; Hilgenboecker et al. 2008) and nematodes (Taylor  
4 et al. 2013). Host species may acquire *Wolbachia* from common ancestors, from sister species  
5 via hybridization and introgression, or horizontally (O'Neill et al. 1992; Rousset and Solignac  
6 1995; Huigens et al. 2004; Baldo et al. 2008; Raychoudhury et al. 2009; Gerth and Bleidorn  
7 2016; Schuler et al. 2016; Turelli et al. 2018). *Wolbachia* often manipulate host reproduction,  
8 inducing cytoplasmic incompatibility (CI) and male killing in *Drosophila* (Laven 1951; Yen and  
9 Barr 1971; Hoffmann et al. 1986; Hoffmann and Turelli 1997; Hurst and Jiggins 2000). CI  
10 reduces egg hatch when *Wolbachia*-uninfected females mate with infected males. Three  
11 parameters usefully approximate the frequency dynamics and equilibria of CI-causing *Wolbachia*  
12 that do not distort sex ratios: the relative hatch rate of uninfected eggs fertilized by infected  
13 males ( $H$ ), the fitness of infected females relative to uninfected females ( $F$ ), and the proportion  
14 of uninfected ova produced by infected females ( $\mu$ ) (Caspari and Watson 1959; Hoffmann et al.  
15 1990). To spread deterministically from low frequencies, *Wolbachia* must produce  $F(1 - \mu) > 1$ ,  
16 irrespective of CI. Once they become sufficiently common, CI-causing infections, such as *w*Ri-  
17 like *Wolbachia* in *Drosophila simulans* and several other *Drosophila* (Turelli et al. 2018), spread  
18 to high equilibrium frequencies, dominated by a balance between CI and imperfect maternal  
19 transmission (Turelli and Hoffmann 1995; Kreisner et al. 2016). In contrast, non-CI-causing  
20 *Wolbachia*, such as *w*Au in *D. simulans* (Hoffmann et al. 1996), typically persist at lower  
21 frequencies, presumably maintained by a balance between positive *Wolbachia* effects on host  
22 fitness and imperfect maternal transmission (Hoffmann and Turelli 1997; Kreisner et al. 2013).  
23 When  $H < F(1 - \mu) < 1$ , “bistable” dynamics result, producing stable equilibria at 0 and at a  
24 higher frequency denoted  $p_s$ , where  $0.50 < p_s \leq 1$  (Turelli and Hoffmann 1995). Bistability  
25 explains the pattern and (slow) rate of spread of *w*Mel transinfected into *Aedes aegypti* to  
26 suppress the spread of dengue, Zika and other human diseases (Hoffmann et al. 2011; Barton and  
27 Turelli 2011; Turelli and Barton 2017; Schmidt et al. 2017).

28 In contrast to the bistability observed with *w*Mel transinfections, natural *Wolbachia*  
29 infections seem to spread via “Fisherian” dynamics with  $F(1 - \mu) > 1$  (Fisher 1937; Kreisner et  
30 al. 2013; Hamm et al. 2014). Several *Wolbachia* effects could generate  $F(1 - \mu) > 1$ , but we do

31 not yet know which ones actually do. For example, *w*Ri has evolved to increase *D. simulans*  
32 fecundity in only a few decades (Weeks et al. 2007), *w*Mel seems to enhance *D. melanogaster*  
33 fitness in high and low iron environments (Brownlie et al. 2009), and several *Wolbachia*  
34 including *w*Mel protect their *Drosophila* hosts from RNA viruses (Hedges et al. 2008; Teixeira  
35 et al. 2008; Martinez et al. 2014). However, it remains unknown which if any these potential  
36 fitness benefits underlie *Wolbachia* spread in nature. For instance, *w*Mel seems to have little  
37 effect on viral abundance in wild-caught *D. melanogaster* (Webster et al. 2015; Shi et al. 2018).

38 *D. mauritiana*, *D. simulans* and *D. sechellia* comprise the *D. simulans* clade within the nine-  
39 species *D. melanogaster* subgroup of *Drosophila*. The *D. simulans* clade diverged from *D.*  
40 *melanogaster* approximately three million years ago (mya), with the island endemics *D. sechellia*  
41 (Seychelles archipelago) and *D. mauritiana* (Mauritius) thought to originate in only the last few  
42 hundred thousand years (Lachaise et al. 1986; Ballard 2000a; Dean and Ballard 2004;  
43 McDermott and Kliman 2008; Garrigan et al. 2012; Brand et al. 2013; Garrigan et al. 2014). *D.*  
44 *simulans* is widely distributed around the globe, but has never been collected on Mauritius  
45 (David et al. 1989; Legrand et al. 2011). However, evidence of mitochondrial and nuclear  
46 introgression supports interisland migration and hybridization between these species (Ballard  
47 2000a; Nunes et al. 2010; Garrigan et al. 2012), which could allow introgressive *Wolbachia*  
48 transfer (Rousset and Solignac 1995).

49 *D. mauritiana* is infected with *Wolbachia* denoted *w*Mau, likely acquired via introgression  
50 from other *D. simulans*-clade hosts (Rousset and Solignac 1995). *Wolbachia* variant *w*Mau may  
51 also infect *D. simulans* (denoted *w*Ma in *D. simulans*) in Madagascar and elsewhere in Africa  
52 and the South Pacific (Ballard 2000a; Ballard 2004). *w*Mau does not cause CI in *D. mauritiana*  
53 or when transinfected into *D. simulans* (Giordano et al. 1995). Yet it is very closely related to  
54 *w*No strains that do cause CI in *D. simulans* (Merçot et al. 1995; Rousset and Solignac 1995;  
55 James and Ballard 2000, 2002). (Also, *D. simulans* seems to be a “permissive” host for CI, as  
56 evidenced by the fact that *w*Mel, which causes little CI in its native host, *D. melanogaster*,  
57 causes intense CI in *D. simulans* [Poinsot et al. 1998].) Fast et al. (2011) reported that a *w*Mau  
58 variant increased *D. mauritiana* fecundity four-fold. This fecundity effect occurred in concert  
59 with *w*Mau-induced alternations of programmed cell death in the germarium and of germline  
60 stem cell mitosis, possibly providing insight into the mechanisms underlying increased egg

61 production (Fast et al. 2011). However, the generality of this finding across *w*Mau variants and  
62 host genetic backgrounds remains unknown.

63 Here, we assess the genetic and phenotypic basis of *w*Mau frequencies in *D. mauritiana* on  
64 Mauritius by combining analysis of *w*Mau draft genomes with analysis of *w*Mau transmission in  
65 the laboratory and *w*Mau effects on host fecundity and egg hatch. We identify a single mutation  
66 that disrupts a locus associated with CI. The loss of CI in *w*Mau is consistent with theory  
67 demonstrating that selection within host species does not act to increase or maintain the level of  
68 CI (Prout 1994; Turelli 1994; Haygood and Turelli 2009), but instead acts to increase  $F(1 - \mu)$ ,  
69 the product of *Wolbachia* effects on host fitness and maternal transmission efficiency (Turelli  
70 1994). The loss of CI helps explain the intermediate *w*Mau frequencies on Mauritius, reported by  
71 us and Giordano et al. (1995). We find no *w*Mau effects on host fecundity, and theoretical  
72 analyses show that even a two-fold fecundity increase cannot be reconciled with the observed  
73 intermediate population frequencies, unless maternal *w*Mau transmission is exceptionally  
74 unreliable in the field. Finally, we present theoretical analyses illustrating that the persistence of  
75 two distinct classes of mtDNA haplotypes among *Wolbachia*-uninfected *D. mauritiana* is  
76 unexpected under a simple null model. Together, our results contribute to understanding the  
77 genomic and phenotypic basis of global *Wolbachia* persistence, which is relevant to improving  
78 *Wolbachia*-based biocontrol of human diseases (Ritchie 2018).

79

## 80 MATERIALS AND METHODS

### 81 *Drosophila* Husbandry and Stocks

82 The *D. mauritiana* isofemale lines used in this study ( $N = 32$ ) were sampled from Mauritius in  
83 2006 by Margarita Womack and kindly provided to us by Prof. Daniel Matute from the  
84 University of North Carolina, Chapel Hill. We also obtained four *D. simulans* stocks (lines 196,  
85 297, 298, and 299) from the National *Drosophila* Species Stock Center that were sampled from  
86 Madagascar. Stocks were maintained on modified version of the standard Bloomington-cornmeal  
87 medium (Bloomington Stock Center, Bloomington, IN) and were kept at 25°C, 12 light:12 dark  
88 photoperiod prior to the start of our experiments.

89

90

91

## 92 **Determining *Wolbachia* infection status and comparing infection frequencies**

93 One to two generations prior to our experiments DNA was extracted from each isofemale line  
94 using a standard ‘squish’ buffer protocol (Gloor et al. 1993), and infection status was determined  
95 using a polymerase chain reaction (PCR) assay (Simpliamp ThermoCycler, Applied Biosystems,  
96 Singapore). We amplified the *Wolbachia*-specific *wsp* gene (Forward: 5’-  
97 TGGTCCAATAAGTGATGAAGAAAC-3’; Reverse: 5’-AAAAATTAAACGCTACTCCA-3’;  
98 Braig et al. 1998) and a nuclear control region of the *2L* chromosome (Forward: 5’-  
99 TGCAGCTATGGTCGTTGACA-3’; Reverse: 5’-ACGAGACAATAATATGTGGTGCTG-3’;  
100 designed here). PCR products were visualized using 1% agarose gels that included a molecular-  
101 weight ladder. Assuming a binomial distribution, we estimated exact 95% binomial confidence  
102 intervals for the infection frequencies on Mauritius. Using Fisher’s Exact Test, we tested for  
103 temporal differences in *w*Mau frequencies by comparing our frequency estimate to a previous  
104 estimate (Giordano et al. 1995). All analyses were performed using R version 3.5.1 (R Team  
105 2015).

106 We used quantitative PCR (qPCR) (MX3000P, Agilent Technologies, Germany) to confirm  
107 that tetracycline-treated flies were cleared of *w*Mau. DNA was extracted from *D. mauritiana*  
108 flies after four generations of tetracycline treatment (1-2 generations prior to completing our  
109 experiments), as described below. Our qPCR used a PowerUp™ SYBR™ Green Master Mix  
110 (Applied Biosystems™, California, USA) and amplified *Wolbachia*-specific *wsp* (Forward: 5’-  
111 CATTGGTGTTGGTGGTGGTG-3’; Reverse: 5’-ACCGAAATAACGAGCTCCAG-3’) and  
112 *Rpl32* as a nuclear control (Forward: 5’-CCGCTTCAAGGGACAGTATC-3’; Reverse: 5’-  
113 CAATCTCCTTGCGCTTCTTG-3’;  
114 Newton and Sheehan 2014).

115

## 116 ***Wolbachia* DNA extraction, library preparation, and sequencing**

117 We sequenced *w*Mau-infected *R9*, *R29*, and *R60* *D. mauritiana* genotypes. Tissue samples for  
118 genomic DNA were extracted using a modified CTAB Genomic DNA Extraction protocol. DNA  
119 quantity was tested on an Implen Nanodrop (Implen, München, Germany) and total DNA was  
120 quantified by Qubit Fluorometric Quantitation (Invitrogen, Carlsbad, California, USA). DNA  
121 was cleaned using Agencourt AMPure XP beads (Beckman Coulter, Inc., Brea, CA, U.S.A),  
122 following manufacturers’ instructions, and eluted in 50 µl 1× TE Buffer for shearing. DNA was

123 sheared using a Covaris E220 Focused Ultrasonicator (Covaris Inc., Woburn, MA) to a target  
124 size of 400 bp. We prepared libraries using NEBNext® Ultra™ II DNA Library Prep with  
125 Sample Purification Beads (New England BioLabs, Ipswich, Massachusetts). Final fragment  
126 sizes and concentrations were confirmed using a TapeStation 2200 system (Agilent, Santa Clara,  
127 California). We indexed samples using NEBNext® Multiplex Oligos for Illumina® (Index  
128 Primers Set 3 & Index Primers Set 4), and 10 µl of each sample was shipped to Novogene  
129 (Sacramento, CA) for sequencing using Illumina HiSeq 4000 (San Diego, CA), generating  
130 paired-end, 150 bp reads.

131

### 132 ***Wolbachia* assembly**

133 We obtained published reads ( $N = 6$ ) from Garrigan et al. (2014), and assembled these genomes  
134 along with the *R9*, *R29*, and *R60* genomes that we sequenced. Reads were trimmed using Sickle  
135 v. 1.33 (Joshi and Fass 2011) and assembled using ABySS v. 2.0.2 (Jackman et al. 2017). *K*  
136 values of 41, 51, 61, and 71 were used, and scaffolds with the best nucleotide BLAST matches to  
137 known *Wolbachia* sequences with E-values less than  $10^{-10}$  were extracted as the draft *Wolbachia*  
138 assemblies. We deemed samples infected if the largest *Wolbachia* assembly was at least 1  
139 million bases and uninfected if the largest assembly was fewer than 100,000 bases. No samples  
140 produced *Wolbachia* assemblies between 100,000 and 1 million bases. Of the six sets of  
141 published reads we analyzed (Garrigan et al. 2014), only lines *R31* and *R41* were *wMau*-infected.  
142 We also screened the living copies of these lines for *wsp* using PCR, and both were infected,  
143 supporting reliable *wMau* transmission in the lab since these lines were sampled in nature.

144 To assess the quality of our draft assemblies, we used BUSCO v. 3.0.0 to search for  
145 homologs of the near-universal, single-copy genes in the BUSCO proteobacteria database  
146 (Simao et al. 2015). As a control, we performed the same search using the reference genomes for  
147 *wRi* (Klasson et al. 2009), *wAu* (Sutton et al. 2014), *wMel* (Wu et al. 2004), *wHa* (Ellegaard et  
148 al. 2013), and *wNo* (Ellegaard et al. 2013).

149

### 150 ***Wolbachia* gene extraction and phylogenetics**

151 To determine phylogenetic relationships and estimate divergence times, we obtained the public  
152 *Wolbachia* group-B genomes of: *wAlbB* that infects *Aedes albopictus* (Mavingui et al. 2012),  
153 *wPip\_Pel* that infects *Culex pipiens* (Klasson et al. 2008), *wPip\_Mol* that infects *Culex molestus*

154 (Pinto et al. 2013), *wNo* that infects *Drosophila simulans* (Ellegaard et al. 2013), and *wVitB* that  
155 infects *Nasonia vitripennis* (Kent et al. 2011); in addition to group-A genomes of: *wMel* that  
156 infects *D. melanogaster* (Wu et al. 2004), *wSuz* that infects *D. sukuzii* (Siozios et al. 2013), four  
157 *Wolbachia* that infect *Nomada* bees (*wNFe*, *wNPa*, *wNLeu*, and *wNFa*; Gerth and Bleidorn  
158 2016), and three *Wolbachia* that infect *D. simulans* (*wRi*, *wAu* and *wHa*; Klasson et al. 2009;  
159 Sutton et al. 2014; Ellegaard et al. 2013). The previously published genomes and the five *wMau*-  
160 infected *D. mauritiana* genomes were annotated with Prokka v. 1.11, which identifies homologs  
161 to known bacterial genes (Seemann 2014). To avoid pseudogenes and paralogs, we used only  
162 genes present in a single copy, and with no alignment gaps, in all of the genome sequences.  
163 Genes were identified as single copy if they uniquely matched a bacterial reference gene  
164 identified by Prokka v. 1.11. By requiring all homologs to have identical length in all of the draft  
165 *Wolbachia* genomes, we removed all loci with indels. 143 genes, a total of 113,943 bp, met these  
166 criteria when comparing all of these genomes. However, when our analysis was restricted to the  
167 five *wMau* genomes, our criteria were met by 694 genes, totaling 704,613 bp. Including *wNo*  
168 with the five *wMau* genomes reduced our set to 671 genes with 682,494 bp. We calculated the  
169 percent differences for the three codon positions within *wMau* and between *wMau* and *wNo*.

170 We estimated a Bayesian phylogram of the *Wolbachia* sequences with RevBayes 1.0.8  
171 under the GTR +  $\Gamma$  model, partitioning by codon position (Höhna et al. 2016). Four independent  
172 runs were performed, which all agreed.

173 We estimated a chronogram from the *Wolbachia* sequences using the absolute chronogram  
174 procedure implemented in Turelli et al. (2018). Briefly, we generated a relative relaxed-clock  
175 chronogram with the GTR +  $\Gamma$  model with the root age fixed to 1 and the data partitioned by  
176 codon position. The relaxed clock branch rate prior was  $\Gamma(2,2)$ . We used substitution-rate  
177 estimates of  $\Gamma(7,7) \times 6.87 \times 10^{-9}$  substitutions/3<sup>rd</sup> position site/year to transform the relative  
178 chronogram into an absolute chronogram. This rate estimate was chosen so that the upper and  
179 lower credible intervals matched the posterior distribution estimated by Richardson et al. (2012),  
180 assuming 10 generations/year, normalized by their median estimate of  $6.87 \times 10^{-9}$  substitutions/3<sup>rd</sup>  
181 position site/year. Although our relaxed-clock analyses allow for variation in substitution rates  
182 across branches, our conversion to absolute time depends on the unverified assumption that the  
183 median substitution rate estimated by Richardson et al. (2012) for *wMel* is relevant across these  
184 broadly diverged *Wolbachia*. (To assess the robustness of our conclusions to model assumptions,



185 we also performed a strict-clock analysis and a relaxed-clock analysis with branch-rate prior  
186  $\Gamma(7,7)$ .) For each analysis, four independent runs were performed, which all agreed. Our analyses  
187 all support *wNo* as sister to *wMau*.

188 We also estimated a relative chronogram for the host species using the procedure  
189 implemented in Turelli et al. (2018). Our host phylogeny was based on the same 20 nuclear  
190 genes used in Turelli et al. (2018): *aconitase*, *aldolase*, *bicoid*, *ebony*, *enolase*, *esc*, *g6pdh*, *glyp*,  
191 *glys*, *ninaE*, *pepck*, *pgi*, *pgm*, *pic*, *ptc*, *tpi*, *transaldolase*, *white*, *wingless* and *yellow*.

192

### 193 **Analysis of *Wolbachia* and mitochondrial genomes**

194 We looked for copy number variation (CNV) between *wMau* and its closest relative, *wNo* across  
195 the whole *wNo* genome. Reads from the five infected *wMau* lines were aligned to the *wNo*  
196 reference (Ellegaard et al. 2013) with bwa 0.7.12 (Li and Durbin 2009). We calculated the  
197 normalized read depth for each alignment over sliding 1,000-bp windows by dividing the  
198 average depth in the window by the average depth over the entire *wNo* genome. The results were  
199 plotted and visually inspected for putative copy number variants (CNVs). The locations of CNVs  
200 were specifically identified with ControlFREEEC v. 11.5 (Boeva et al. 2012), using a ploidy of  
201 one and a window size of 1,000. We calculated *P*-values for each identified CNV with the  
202 Wilcoxon Rank Sum and the Kolmogorov-Smirnov tests implemented in ControlFREEEC.

203 We used BLAST to search for pairs of CI-factor (*cif*) homologs in *wMau* and *wNo* genomes  
204 that are associated with CI (Beckmann and Fallon 2013; Beckmann et al. 2017; LePage et al.  
205 2017; Lindsey et al. 2018; Beckmann et al. 2019). (We adopt Beckmann et al. (2019)'s  
206 nomenclature that assigns names to loci based on their predicted enzymatic function, with  
207 superscripts denoting the focal *Wolbachia* strain.) These include predicted CI-inducing  
208 deubiquitylase (*cid*) *wPip\_0282-wPip\_0283* (*cidA-cidB<sup>wPip</sup>*) and CI-inducing nuclease (*cin*)  
209 *wPip\_0294-wPip\_0295* (*cinA-cinB<sup>wPip</sup>*) pairs that induce toxicity and rescue when expressed/co-  
210 expressed in *Saccharomyces cerevisiae* (Beckmann et al. 2017 and Beckmann et al. 2019);  
211 WD0631-WD632 (*cidA-cidB<sup>wMel</sup>*) that recapitulate CI when transgenically expressed in *D.*  
212 *melanogaster* (LePage et al. 2017); and *wNo\_RS01055* and *wNo\_RS01050* that have been  
213 identified as a Type III *cifA-cifB* pair in the *wNo* genome (LePage et al. 2017; Lindsey et al.  
214 2018). *wNo\_RS01055* and *wNo\_RS01050* are highly diverged from *cidA-cidB<sup>wMel</sup>* and *cidA-*  
215 *cidB<sup>wPip</sup>* homologs and from *cinA-cinB<sup>wPip</sup>*; however, this *wNo* pair is more similar to *cinA-*

216 *cinB*<sup>wPip</sup> in terms of protein domains, lacking a ubiquitin-like protease domain (Lindsey et al.  
217 2018). We refer to these loci as *cinA-cinB*<sup>wNo</sup>.

218 We found only homologs of the *cinA-cinB*<sup>wNo</sup> pair in *wMau* genomes, which we extracted  
219 from our draft *wMau* assemblies and aligned with MAFFT v. 7 (Kato and Standley 2013). We  
220 compared *cinA-cinB*<sup>wNo</sup> to the *wMau* homologs to identify single nucleotide variants (SNVs)  
221 among our *wMau* assemblies.

222 *D. mauritiana* carry either the *maI* mitochondrial haplotype, associated with *wMau*  
223 infections, or the *maII* haplotype (Rousset and Solignac 1995; Ballard 2000a; James and Ballard  
224 2000). To determine the mitochondrial haplotype of each *D. mauritiana* line, we assembled the  
225 mitochondrial genomes by down-sampling the reads by a factor of 100, then assembling with  
226 ABySS 2.0.2 using a *K* value of 71 for our data (150 bp reads) and 35 for the published data (76  
227 bp reads) (Garrigan et al. 2014). Down-sampling reads prevents the nuclear genome from  
228 assembling but does not inhibit assembly of the mitochondrial genome, which has much higher  
229 coverage. We deemed the mitochondrial assembly complete if all 13 protein-coding genes were  
230 present on the same contig and in the same order as in *D. melanogaster*. If the first attempt did  
231 not produce a complete mitochondrial assembly, we adjusted the down-sampling fraction until a  
232 complete assembly was produced for each line.

233 Annotated reference mitochondrial sequences for the *D. mauritiana* mitochondrial  
234 haplotypes *maI* and *maII* were obtained from Ballard et al. (2000b), and the 13 protein-coding  
235 genes were extracted from our assemblies using BLAST and aligned to these references. The  
236 *maI* and *maII* reference sequences differ at 343 nucleotides over these protein-coding regions.  
237 We identified our lines as carrying the *maI* haplotype if they differed by fewer than five  
238 nucleotides from the *maI* reference and as *maII* if they differed by fewer than five nucleotides  
239 from the *maII* reference. None of our assemblies differed from both references at five or more  
240 nucleotides.

241

## 242 ***wMau* phenotypic analyses**

243 Previous analyses have demonstrated that *wMau* does not cause CI (Giordano et al. 1995). To  
244 check the generality of this result, we reciprocally crossed *wMau*-infected *R3I D. mauritiana*  
245 with uninfected *R4* and measured egg hatch. Flies were reared under controlled conditions at  
246 25°C for multiple generations leading up to the experiment. We paired 1–2-day-old virgin

247 females with 1–2-day-old males in a vial containing spoons with cornmeal media and yeast  
248 paste. After 24 hr, pairs were transferred to new spoons, and this process was repeated for five  
249 days. Eggs on each spoon were given 24 hr at 25°C to hatch after flies were removed. To test for  
250 CI, we used nonparametric Wilcoxon tests to compare egg hatch between reciprocal crosses that  
251 produced at least 10 eggs. All experiments were carried out at 25°C with a 12 light:12 dark  
252 photoperiod.

253 To determine if *wMau* generally enhances *D. mauritiana* fecundity, we assessed the  
254 fecundity of two *wMau*-infected isofemale lines from Mauritius (*R31* and *R41*); we also  
255 reciprocally introgressed *wMau* from each of these lines to assess host effects. To do this we  
256 crossed *R31* females with *R41* males and backcrossed F<sub>1</sub> females to *R41* males—this was  
257 repeated for four generations to generate the reciprocally introgressed *R41*<sup>*R31*</sup> genotypes (*wMau*  
258 variant denoted by superscripts). A similar approach was taken to generate *R31*<sup>*R41*</sup> genotypes.  
259 This approach has previously revealed *D. teissieri*-host effects on *wTei*-induced CI (Cooper et al.  
260 2017). To assay fecundity, we reciprocally crossed each genotype (*R31*, *R41*, *R31*<sup>*R41*</sup>, *R31*<sup>*R31*</sup>) to  
261 uninfected line *R4* to generate paired infected- and uninfected-F<sub>1</sub> females with similar genetic  
262 backgrounds. The *wMau*-infected and uninfected F<sub>1</sub> females were collected as virgins and placed  
263 in holding vials. We paired 3–7-day-old females individually with an uninfected-*R4* male (to  
264 stimulate oviposition) in vials containing a small spoon filled with standard cornmeal medium  
265 and coated with a thin layer of yeast paste. We allowed females to lay eggs for 24 hours, after  
266 which pairs were transferred to new vials. This was repeated for five days. At the end of each 24-  
267 hr period, spoons were frozen until counted. All experiments were carried out at 25°C with a 12  
268 light:12 dark photoperiod.

269 We also measured egg lay of *wMau*-infected (*R31*) and tetracycline-cleared uninfected  
270 (*R31-tet*) genotypes over 24 days, on apple-agar plates, to more closely mimic the methods of  
271 Fast et al. (2011). We fed flies 0.03% tetracycline concentrated medium for four generations to  
272 generate the *R31-tet* genotype. We screened F<sub>1</sub> and F<sub>2</sub> individuals for *wMau* using PCR, and we  
273 then fed flies tetracycline food for two additional generations. In the fourth generation, we  
274 assessed *wMau* titer using qPCR to confirm that each genotype was cleared of *wMau* infection.  
275 We reconstituted the gut microbiome by rearing *R31-tet* flies on food where *R31* males had fed  
276 and defecated for 48 hours. Flies were given at least three more generations to avoid detrimental  
277 effects of tetracycline treatment on mitochondrial function (Ballard and Melvin 2007). We then

278 paired individual 6–7-day-old virgin *R3I* ( $N = 30$ ) and *R3I-tet* ( $N = 30$ ) females in bottles on  
279 yeasted apple-juice agar plates with an *R4* male to stimulate oviposition. Pairs were placed on  
280 new egg-lay plates every 24 hrs. After two weeks, we added one or two additional *R4* males to  
281 each bottle to replace any dead males and to ensure that females were not sperm limited as they  
282 aged.

283 We used nonparametric Wilcoxon tests to assess *wMau* effects on host fecundity. We then  
284 estimated the fitness parameter  $F$  in the standard discrete-generation model of CI (Hoffmann et  
285 al. 1990; Turelli 1994). We used the ‘*pwr.t2n.test*’ function in the ‘*pwr*’ library in R to assess the  
286 power of our data to detect increases to  $F$ . Pairs that laid fewer than 10 eggs across each  
287 experiment were excluded from analyses, but our results are robust to this threshold.

288 To estimate the fidelity of maternal transmission, *R3I* and *R4I* females were reared at 25°C  
289 for several generations prior to our experiment. In the experimental generation, 3–5 day old  
290 inseminated females were placed individually in vials that also contained two males. These *R3I*  
291 ( $N = 17$ ) and *R4I* ( $N = 19$ ) sublines were allowed to lay eggs for one week. In the following  
292 generation we screened F1 offspring for *wMau* infection using PCR as described above.

293

## 294 **RESULTS**

### 295 ***Wolbachia* infection status**

296 Out of 32 *D. mauritiana* lines that we analyzed, 11 were infected with *wMau Wolbachia*  
297 (infection frequency = 0.34; binomial confidence interval: 0.19, 0.53). In contrast, none of the *D.*  
298 *simulans* stocks ( $N = 4$ ) sampled from Madagascar were infected, precluding our ability to  
299 directly compare *wMau* and *wMa*. Our new *wMau* frequency estimate is not statistically different  
300 from a previous estimate (Giordano et al. 1995: infection frequency, 0.46; binomial confidence  
301 interval, (0.34, 0.58); Fisher’s Exact Test,  $P = 0.293$ ), based largely on assaying a heterogenous  
302 collection of stocks in various laboratories. These relatively low infection frequencies are  
303 consistent with theoretical expectations given that *wMau* does not cause CI (Giordano et al.  
304 1995; our data reported below). The intermediate *wMau* frequencies on Mauritius suggest that  
305 *wMau* persists at a balance between positive effects on host fitness and imperfect maternal  
306 transmission. Quantitative predictions, based on the idealized model of Hoffmann and Turelli  
307 (1997), are discussed below. The maintenance of *wMau* is potentially analogous to the  
308 persistence of other non-CI-causing *Wolbachia*, specifically *wAu* in some Australian populations

309 of *D. simulans* (Hoffmann et al. 1996; Kriesner et al. 2013) and *wSuz* in *D. sukuzii* and *wSpc* in  
310 *D. subpulchrella* (Hamm et al. 2014; Conner et al. 2017; Turelli et al. 2018; but see Cattell et al.  
311 2018).

312

### 313 **Draft *wMau* genome assemblies and comparison to *wNo***

314 The five *wMau* draft genomes we assembled were of very similar quality (Supplemental Table  
315 1). N50 values ranged from 60,027 to 63,676 base pairs, and our assemblies varied in total length  
316 from 1,266,004 bases to 1,303,156 bases (Supplemental Table 1). Our BUSCO search found  
317 exactly the same genes in each draft assembly, and the presence/absence of genes in our *wMau*  
318 assemblies was comparable to those in the complete genomes used as controls (Supplemental  
319 Table 2). In comparing our five *wMau* draft genomes over 694 single-copy, equal-length loci  
320 comprising 704,613 bp, we found only one SNP. Four sequences (*R9*, *R31*, *R41* and *R60*) are  
321 identical at all 704,613 bp. *R29* differs from them at a single nucleotide, a nonsynonymous  
322 substitution in a locus which Prokka v. 1.11 annotates as “bifunctional DNA-directed RNA  
323 polymerase subunit beta/beta.”

324 Comparing these five *wMau* sequences to the *wNo* reference (Ellegaard et al. 2013) over  
325 671 genes with 682,494 bp, they differ by 0.068% overall, with equivalent divergence at all three  
326 codon positions (0.067%, 0.061%, and 0.076%, respectively).

327

### 328 ***Wolbachia* phylogenetics**

329 As expected from the sequence comparisons, our group-B phylogram places *wMau* sister to *wNo*  
330 (Figure 1A). This is consistent with previous analyses using fewer loci that placed *wMau* (or  
331 *wMa* in *D. simulans*) sister to *wNo* (James and Ballard 2000; Zabalou et al. 2008; Toomey et al.  
332 2013). Our chronogram (Figure 1B) estimates the 95% credible interval for the split between the  
333 group-B versus group-A *Wolbachia* strains as 6 to 36 mya (point estimate, 16 mya). Reducing  
334 the variance on the substitution-rate-variation prior by using  $\Gamma(7,7)$  rather than  $\Gamma(2,2)$ , changes  
335 the credible interval for the A-B split to 8 to 46 mya (point estimate, 21 mya). In contrast, a strict  
336 clock analysis produces a credible interval of 12 to 64 mya (point estimate, 31 mya). These  
337 estimates are roughly comparable to an earlier result based on a general approximation for the  
338 synonymous substitution rate in bacteria (Ochman and Wilson 1987) and data from only the *ftsZ*  
339 locus (59–67 mya, Werren et al. 1995). However, our estimates are much lower than an

340 alternative estimate based on comparative genomics (217 mya, Gerth and Bleidorn 2016). We  
 341 discuss this discrepancy below.

342 The observed divergence between *wNo* and *wMau* is consistent across all three codon  
 343 positions, similar to other recent *Wolbachia* splits like that between *wRi* and *wSuz* (Turelli et al.  
 344 2018). Conversely, observed divergence at each codon position generally varies across the  
 345 chronogram, leading to inflation of the *wNo-wMau* (181,476 years; credible interval = 27,711 to  
 346 701,205 years; Figure 1B) and *wRi-wSuz* (16,214; credible interval = 1,254 to 70,584)  
 347 divergence point estimates; the latter is about 1.6 times as large as the value in Turelli et al.  
 348 (2018). (Nevertheless, the confidence intervals of our and Turelli et al. (2018)'s *wRi-wSuz*  
 349 divergence estimates overlap.) To obtain an alternative estimate of *wNo-wMau* divergence, we  
 350 estimated divergence time using the observed third-position pairwise divergence (0.077%, or  
 351 0.039% from tip to MRCA) and Richardson et al. (2012)'s estimate of the "short-term  
 352 evolutionary rate" of *Wolbachia* third-position divergence within *wMel*. This approach produces  
 353 a point estimate of 57,000 years, with a credible interval of 30,000 to 135,000 years for the *wNo-*  
 354 *wMau* split. In Cooper et al. (2019), we address in detail how a constant substitution-rate ratio  
 355 among codon positions across the tree, assumed by the model, affects these estimates.

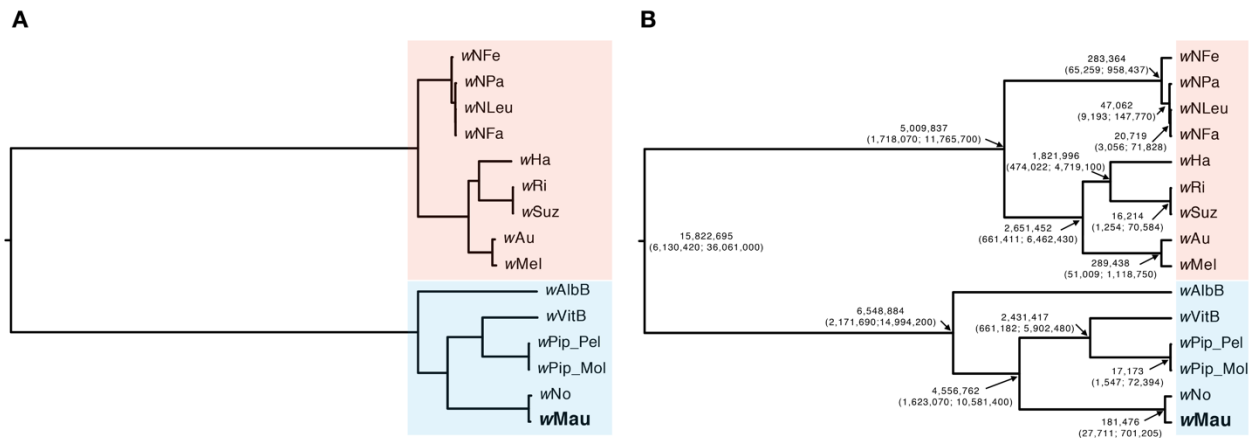

356

357 **Figure 1. A)** An estimated phylogram for various group-A (red) and group-B (blue) *Wolbachia*  
 358 strains. All nodes have Bayesian posterior probabilities of 1. The phylogram shows significant  
 359 variation in the substitution rates across branches, with long branches separating the A and B  
 360 clades. **B)** An estimated chronogram for the same strains, with estimated divergence times and  
 361 their confidence intervals at each node. To obtain these estimates, we generated a relative  
 362 relaxed-clock chronogram with the GTR +  $\Gamma$  model with the root age fixed to 1, the data  
 363 partitioned by codon position, and with a  $\Gamma(2,2)$  branch rate prior. We used substitution-rate  
 364 estimates of  $\Gamma(7,7) \times 6.87 \times 10^{-9}$  substitutions/3<sup>rd</sup> position site/year to transform the relative  
 365 chronogram into an absolute chronogram.

## 376 Analysis of *Wolbachia* and mitochondrial genomes

377 We looked for CNVs in *w*Mau relative to sister *w*No by plotting normalized read depth along the  
378 *w*No genome. There were no differences in copy number among the *w*Mau variants, but  
379 compared to *w*No, ControlFREEEC identified four regions deleted from all *w*Mau that were  
380 significant according to the Wilcoxon Rank Sum and Kolmogorov-Smirnov tests (Figure 2 and  
381 Supplemental Table 3). These deleted regions of the *w*Mau genomes include many genes,  
382 including many phage-related loci, providing interesting candidates for future work (listed in  
383 Supplementary Table 4).

374

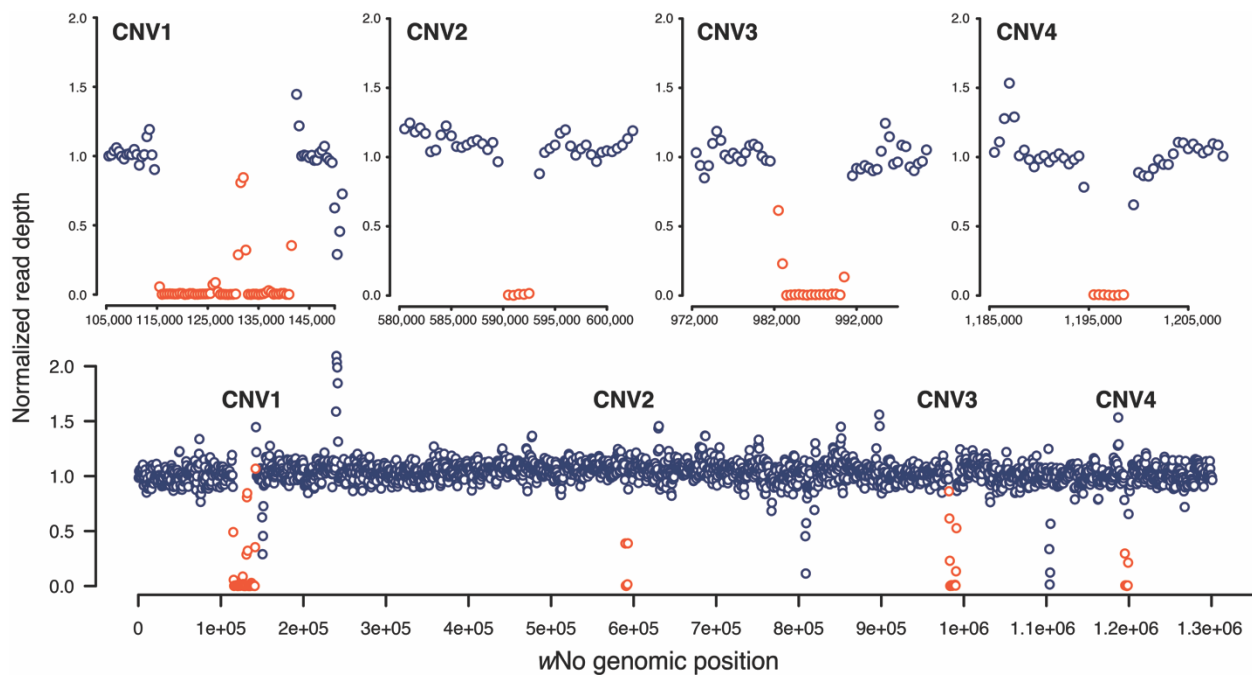

375

376 **Figure 2.** All *w*Mau variants share four large deletions, relative to sister *w*No. Top panel) The  
377 normalized read depth for *w*Mau *R60* plotted across the four focal regions of the *w*No reference  
378 genome; 10 kb of sequence surrounding regions are plotted on either side of each region. Bottom  
379 panel) The normalized read depth of *w*Mau *R60* plotted across the whole *w*No reference genome.  
380 Regions that do not contain statistically significant CNVs are plotted in dark blue, and regions  
381 with significant CNVs are plotted in red. All *w*Mau variants share the same CNVs, relative to  
382 *w*No.

383

384 To test the hypothesis that *cif* loci are disrupted, we searched for pairs of loci known to be  
385 associated with CI and found homologs to the *cinA-cinB*<sup>*w*No</sup> pair in each of our draft assemblies,  
386 but we did not find homologs to the *cidA-cidB*<sup>*w*Mel</sup>, *cidA-cidB*<sup>*w*Pip</sup>, or to the *cinA-cinB*<sup>*w*Pip</sup> pairs.  
387 There were no variable sites in *cinA-cinB*<sup>*w*No</sup> homologs among our five *w*Mau assemblies.

388 Relative to *wNo*, all *wMau* variants share a one base pair deletion at base 1133 out of 2091  
389 (amino acid 378) in the *cinB<sup>wNo</sup>* homolog. This frameshift introduces over 10 stop codons, with  
390 the first at amino acid 388, potentially making this predicted CI-causing-toxin protein  
391 nonfunctional. We also identified a nonsynonymous substitution in amino acid 264 of the  
392 *cinB<sup>wNo</sup>* homolog (*wNo* codon ACA, Thr; *wMau* codon AUA, Ile) and two SNVs in the region  
393 homologous to *cinA<sup>wNo</sup>*: a synonymous substitution in amino acid 365 (*wNo* codon GUC, *wMau*  
394 codon GUU) and a nonsynonymous substitution in amino acid 397 (*wNo* codon GCU, amino  
395 acid Ala; *wMau* codon GAU, amino acid Asp). Disruption of CI is consistent with theoretical  
396 analyses showing that selection within a host species does not act directly on the level of CI  
397 (Prout 1994; Turelli 1994; Haygood and Turelli 2009). Future functional analyses will determine  
398 whether disruption of regions homologous to *cinA-cinB<sup>wNo</sup>* underlie the lack of *wMau* CI.

399 Of the *D. mauritiana* lines tested ( $N = 9$ ), one line (uninfected-*R44*) carries the *maII*  
400 mitochondrial haplotype, while the other eight carry *maI*. Rousset and Solignac (1995) reported a  
401 similar *maII* frequency, with 3 of 26 lines sampled in 1985 carrying *maII*. The *maI* and *maII*  
402 references differ by 343 SNVs across the proteome, and *R44* differs from the *maII* reference by 4  
403 SNVs in the proteome. Four of our *maI* lines (*R23*, *R29*, *R32*, and *R39*) are identical to the *maI*  
404 reference, while three (*R31*, *R41*, and *R60*) have one SNV and one (*R9*) has two SNVs relative to  
405 *maI* reference. One SNV is shared between *R9* and *R60*, but the other three SNVs are unique.  
406 Our results agree with past analyses that found *wMau* is perfectly associated with the *maI*  
407 mitochondrial haplotype (Rousset and Solignac 1995; Ballard 2000a; James and Ballard 2000).  
408 The presence of *maII* among the uninfected is interesting. In contrast to *maI*, which is associated  
409 with introgression with *D. simulans* (Ballard 2000a; James and Ballard 2000), *maII* appears as an  
410 outgroup on the mtDNA phylogeny of the *D. simulans* clade and is not associated with  
411 *Wolbachia* (Ballard 2000b, Fig. 5; James and Ballard 2000). Whether or not *Wolbachia* cause CI,  
412 if they are maintained by selection-imperfect-transmission balance, we expect all uninfected flies  
413 to eventually carry the mtDNA associated with infected mothers (Turelli et al. 1992). We present  
414 a mathematical analysis of the persistence of *maII* below.

415

#### 416 **Analysis of *wMau* phenotypes**

417 In agreement with Giordano et al. (1995), we found no difference between the egg hatch of  
418 uninfected females crossed to *wMau*-infected males ( $0.34 \pm 0.23$  SD,  $N = 25$ ) and the reciprocal



419 cross ( $0.29 \pm 0.28$  SD,  $N = 24$ ), indicating no CI. In contrast to Fast et al. (2011), we find no  
 420 evidence that *w*Mau affects *D. mauritiana* fecundity (Supplemental Table 5 and Figure 3),  
 421 regardless of host genetic backgrounds. Across both experiments assessing *w*Mau fecundity  
 422 effects in their natural backgrounds (*R31* and *R41*), we counted 27,221 eggs and found no  
 423 difference in the number of eggs laid by infected (mean = 238.20, SD = 52.35,  $N = 60$ ) versus  
 424 uninfected (mean = 226.82, SD = 67.21,  $N = 57$ ) females over the five days of egg lay (Wilcoxon  
 425 test,  $W = 1540.5$ ,  $P = 0.357$ ); and across both experiments that assessed *w*Mau fecundity effects  
 426 in novel host backgrounds (*R31<sup>R41</sup>* and *R41<sup>R31</sup>*), we counted 30,358 eggs and found no difference  
 427 in the number of eggs laid by infected (mean = 253.30, SD = 51.99,  $N = 60$ ) versus uninfected  
 428 (mean = 252.67, SD = 63.53,  $N = 60$ ) females over five days (Wilcoxon test,  $W = 1869.5$ ,  $P =$   
 429 0.719). [The mean number of eggs laid over five days, standard deviation (SD), sample size ( $N$ ),  
 430 and  $P$ -values from Wilcoxon tests are presented in Supplemental Table 5 for all pairs.]  
 431

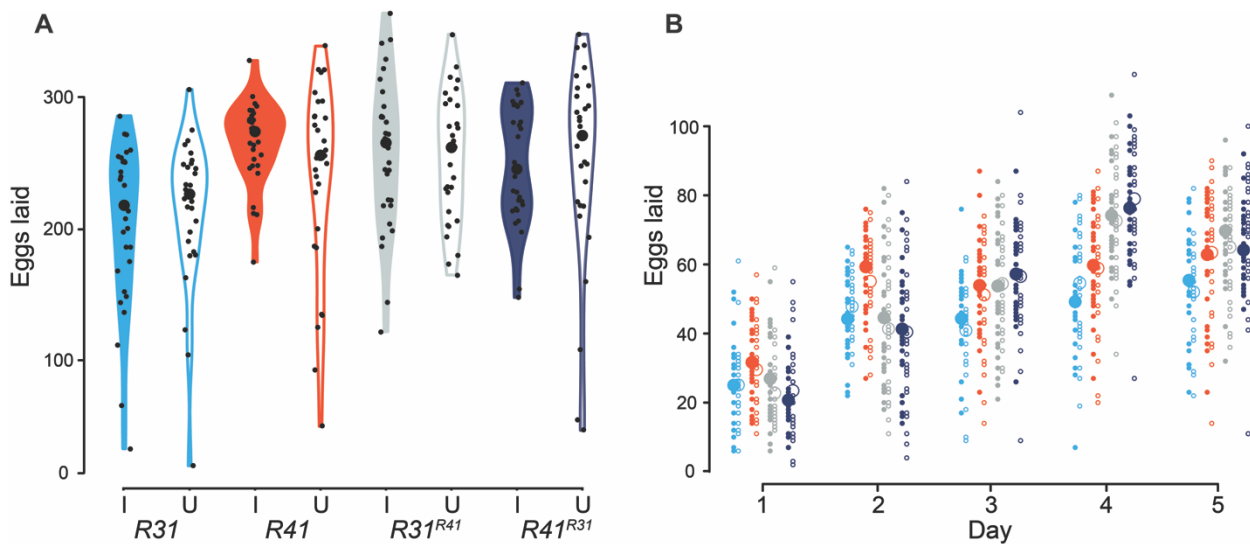

432  
 433 **Figure 3.** *w*Mau infections do not influence *D. mauritiana* fecundity, regardless of host genomic  
 434 background. **A)** Violin plots of the number of eggs laid by *D. mauritiana* females over five days  
 435 when infected with their natural *w*Mau variant (*R31I* and *R41I*), when infected with a novel  
 436 *w*Mau variant (*R31<sup>R41</sup>I* and *R41<sup>R31</sup>I*), and when uninfected (*R31U*, *R41U*, *R31<sup>R41</sup>U*, and  
 437 *R41<sup>R31</sup>U*). Large black dots are medians, and small black dots are the eggs laid by each replicate  
 438 over five days. **B)** The daily egg lay of these same infected (solid circles) and uninfected (open  
 439 circles) *R31* (aqua), *R41* (red), *R31<sup>R41</sup>* (gray), and *R41<sup>R31</sup>* (dark blue) genotypes is reported. Large  
 440 circles are means of all replicates, and small circles are the raw data. Only days where females  
 441 laid at least one egg are plotted. Cytoplasm sources are denoted by superscripts for the  
 442 reciprocally introgressed strains.  
 443  
 444

445 We sought to determine if *w*Mau fecundity effects depend on host age with a separate  
446 experiment that assessed egg lay over 24 days on apple-agar plates, similar to Fast et al. (2011).  
447 Across all ages, we counted 9,459 eggs and found no difference in the number of eggs laid by  
448 infected (mean = 156.29, SD = 138.04,  $N = 28$ ) versus uninfected (mean = 187.70, SD = 168.28,  
449  $N = 27$ ) females (Wilcoxon test,  $W = 409$ ,  $P = 0.608$ ) (Figure 4). While our point estimates  
450 indicate that *w*Mau does not increase host fecundity, egg lay was generally lower and more  
451 variable on agar plates relative to our analyses of egg lay on spoons described above.  
452  
453

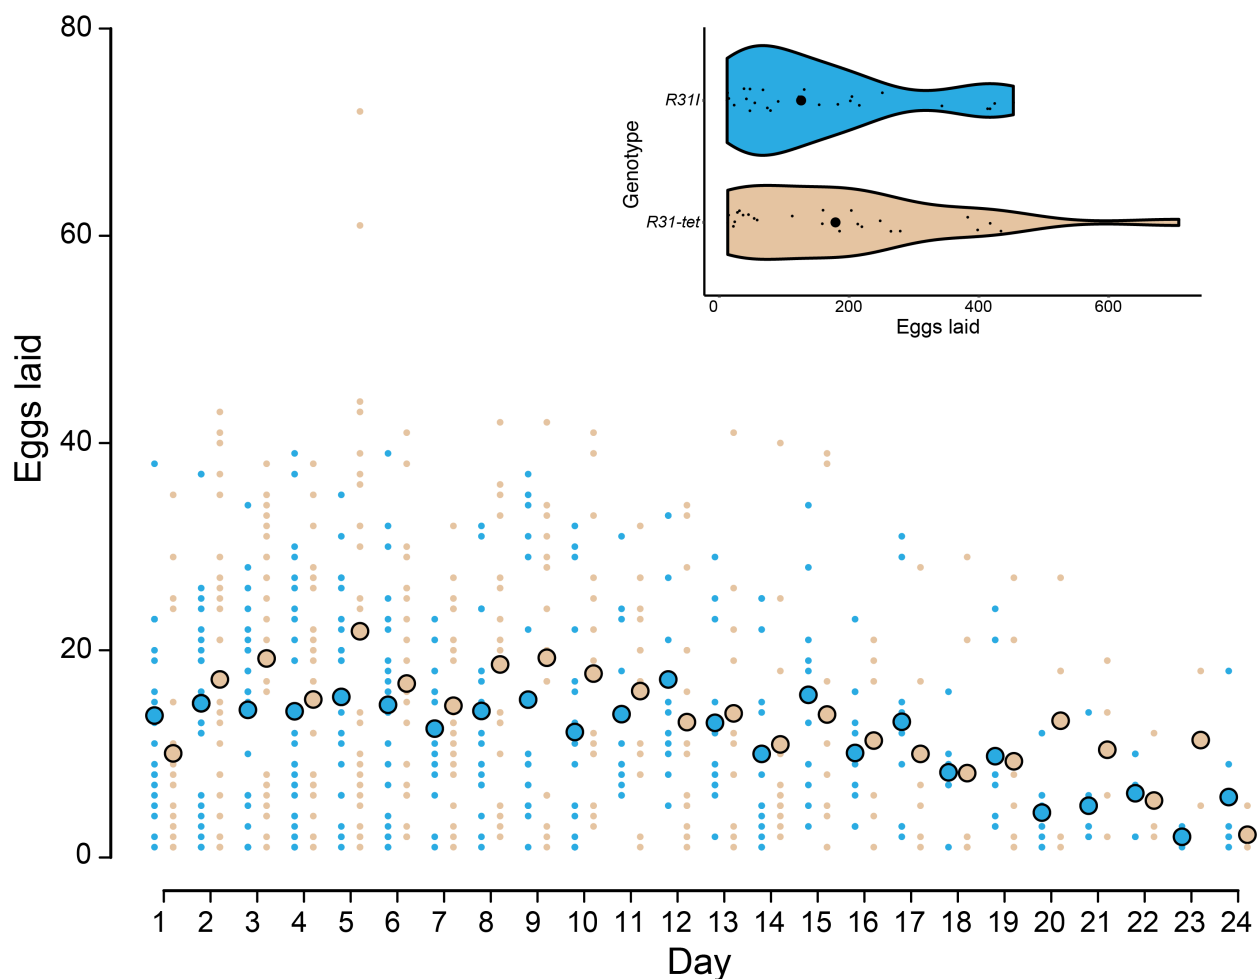

454  
455 **Figure 4.** The mean number of eggs laid by infected *R31* (*R31I*, large aqua dots) and uninfected  
456 *R31-tet* (large tan dots) genotypes are similar. Egg counts for each replicate are also plotted  
457 (small dots). Violin plots show egg lay across all ages for each genotype; large black circles are  
458 medians, and small black circles are the number of eggs laid by each replicate.  
459  
460

461 With these data, we estimated the fitness parameter  $F$  in the standard discrete-generation  
462 model of CI (Hoffmann et al. 1990; Turelli 1994). Taking the ratio of replicate mean fecundity  
463 observed for  $w$ Mau-infected females to the replicate mean fecundity of uninfected females in  
464 naturally sampled  $R31$  and  $R41$  *D. mauritiana* backgrounds, we estimated  $F = 1.05$  (95%  $BC_a$   
465 interval: 0.96, 1.16). Following reciprocal introgression of  $w$ Mau and host backgrounds (i.e., the  
466  $R31^{R41}$  and  $R41^{R31}$  genotypes), we estimated  $F = 1.0$  (95%  $BC_a$  interval: 0.93, 1.09). Finally,  
467 across all 24 days of our age-effects experiment, we estimated  $F = 0.83$ , 95%  $BC_a$  interval: 0.52,  
468 1.32) for  $R31$ , which overlaps with our estimate of  $F$  for  $R31$  in our initial experiment (Table 1).  
469  $BC_a$  confidence intervals were calculated using the two-sample acceleration constant given by  
470 equation 15.36 of Efron and Tibshirani (1993). (Estimates of  $F$  and the associated  $BC_a$   
471 confidence intervals are reported in Table 1 for each genotype and condition.) Consistent with  
472 our other analyses, we find little evidence that  $w$ Mau significantly increases fecundity. However,  
473 our data do not have much statistical power to detect values of  $F$  on the order of 1.05, which may  
474 suffice to produce  $F(1 - \mu) > 1$  and deterministic spread of  $w$ Mau from low frequencies. We  
475 present our power calculations in Figure 1B of the Supplementary Information.

476

**Table 1.** Estimates of the relative fitness parameter  $F$  indicate that  $w$ Mau fecundity effects are likely to be minimal.

| <b><math>w</math>Mau variant/age class</b> | <b><math>F</math></b> | <b>95% <math>BC_a</math> interval</b> |
|--------------------------------------------|-----------------------|---------------------------------------|
| <i>R31</i>                                 | 0.988                 | (0.862, 1.137)                        |
| <i>R41</i>                                 | 1.107                 | (0.995, 1.265)                        |
| <i>R31<sup>R41</sup></i>                   | 1.012                 | (0.911, 1.122)                        |
| <i>R41<sup>R31</sup></i>                   | 0.992                 | (0.884, 1.143)                        |
| <i>R31</i> (across age)                    | 0.833                 | (0.515, 1.323)                        |

477

478

479 Finally, we assessed the fidelity of  $w$ Mau maternal transmission under standard laboratory  
480 conditions. We excluded sublines that produced fewer than 8 F1 offspring. In all cases,  $R31$  ( $N =$   
481 17) sublines produced offspring that were all infected, indicating perfect maternal transmission.  
482 In contrast, one  $R41$  subline produced one uninfected individual out of a total of 18 F1 offspring  
483 produced; all other  $R41$  sublines meeting our criteria ( $N = 15$ ) produced only infected F1  
484 offspring, resulting in nearly perfect maternal transmission across all  $R41$  sublines ( $\mu = 0.0039$ ).

## 485 **Mathematical analyses of *Wolbachia* frequencies and mtDNA polymorphism**

486 If *Wolbachia* do not cause CI (or any other reproductive manipulation), their dynamics can be  
487 approximated by a discrete-generation haploid selection model. Following Hoffmann and Turelli  
488 (1997), we assume that the relative fecundity of *Wolbachia*-infected females is  $F$ , but a fraction  
489  $\mu$  of their ova do not carry *Wolbachia*. Given our ignorance of the nature of *Wolbachia*'s  
490 favorable effects, the  $F$  represents an approximation for all fitness benefits. If  $F(1 - \mu) > 1$ , the  
491 equilibrium *Wolbachia* frequency among adults is

492

$$493 \quad \hat{p} = 1 - \frac{\mu F}{F - 1}. \quad (1)$$

494

495 Imperfect maternal transmission has been documented for field-collected *D. simulans* infected  
496 with  $w_{\text{Ri}}$  (Hoffmann and Turelli 1988; Turelli and Hoffmann 1995; Carrington et al. 2011), *D.*  
497 *melanogaster* infected with  $w_{\text{Mel}}$  (Hoffmann et al. 1998) and *D. suzukii* infected with  $w_{\text{Suz}}$   
498 (Hamm et al. 2014). The estimates range from about 0.01 to 0.1. Given that we have documented  
499 imperfect maternal transmission of  $w_{\text{Mau}}$  in the laboratory, we expect (more) imperfect  
500 transmission in nature (Turelli and Hoffmann 1995; Carrington et al. 2011). In order for the  
501 equilibrium *Wolbachia* frequency to be below 0.5, approximation (1) requires that the relative  
502 fecundity of infected females satisfies

503

$$504 \quad F < \frac{1}{1 - 2\mu}. \quad (2)$$

505

506 Thus, even for  $\mu$  as large as 0.15, which greatly exceeds our laboratory estimates for  $w_{\text{Mau}}$  and  
507 essentially all estimates of maternal transmission failure from nature, *Wolbachia* can increase  
508 fitness by at most 43% and produce an equilibrium frequency below 0.5 (Supplemental Figure  
509 1A). Conversely, (1) implies that a doubling of relative fecundity by *Wolbachia* would produce  
510 an equilibrium frequency  $1 - 2\mu$ . If  $\mu \leq 0.25$ , consistent with all available data, the predicted  
511 equilibrium implied by a *Wolbachia*-induced fitness doubling significantly exceeds the observed  
512 frequency of  $w_{\text{Mau}}$ . Hence, a four-fold fecundity effect, as described by Fast et al. (2011), is  
513 inconsistent with the frequency of  $w_{\text{Mau}}$  in natural populations of *D. mauritiana*. Field estimates  
514 of  $\mu$  for *D. mauritiana* will provide better theory-based bounds on  $w_{\text{Mau}}$  fitness effects that

515 would be consistent with  $w$ Mau tending to increase when rare on Mauritius, i.e., conditions for  
516  $F(1 - \mu) > 1$ .

517 Our theoretical analysis, addressing the plausibility of a four-fold fitness increase caused by  
518  $w$ Mau, assumes that the observed frequency of  $w$ Mau approximates selection-transmission  
519 equilibrium, as described by (1). With only two frequency estimates (one from a heterogeneous  
520 collection of laboratory stocks), we do not know that the current low frequency is temporarily  
521 stable. Also, we do not know that the mutations we detect in *cinA-cinB*<sup>wNo</sup> homologs are  
522 responsible for the lack of  $w$ Mau CI. One alternative is that *D. mauritiana* has evolved to  
523 suppress CI (for host suppression of male killing, see Hornet et al. 2006 and Vanthournout and  
524 Hendrickx 2016). Host suppression of CI is expected (Turelli 1994), and it may explain the low  
525 CI caused by  $w$ Mel in *D. melanogaster* (Hoffmann and Turelli 1997). However, the fact that  
526  $w$ Mau does not produce CI in *D. simulans*, a host that allows  $w$ Mel and other strains to induce  
527 strong CI even though little CI is produced in their native hosts, argues against host suppression  
528 as the explanation for the lack of CI caused by  $w$ Mau in *D. mauritiana*. Nevertheless, the loss of  
529 CI from  $w$ Mau may be quite recent; and  $w$ Mau may be on its way to elimination in *D.*  
530 *mauritiana*. If so, our equilibrium analysis is irrelevant – but this gradual-loss scenario is equally  
531 inconsistent with the four-fold fecundity effect proposed by Fast et al. (2011).

532 As noted by Turelli et al. (1992), if *Wolbachia* is introduced into a population along with a  
533 diagnostic mtDNA haplotype that has no effect on fitness, imperfect *Wolbachia* maternal  
534 transmission implies that all infected and uninfected individuals will eventually carry the  
535 *Wolbachia*-associated mtDNA, because all will have had *Wolbachia*-infected maternal ancestors.  
536 We conjectured that a stable mtDNA polymorphism might be maintained if *Wolbachia*-  
537 associated mtDNA introduced by introgression is deleterious in its new nuclear background. We  
538 refute our conjecture in Appendix 1. We show that the condition for *Wolbachia* to increase when  
539 rare,  $F(1 - \mu) > 1$ , ensures that the native mtDNA will be completely displaced by the  
540 *Wolbachia*-associated mtDNA, even if it lowers host fitness once separated from *Wolbachia*.

541 How fast is the mtDNA turnover, among *Wolbachia*-uninfected individuals, as a new  
542 *Wolbachia* invades? This is easiest to analyze when the mtDNA introduced with *Wolbachia* has  
543 no effect on fitness, so that the relative fitness of *Wolbachia*-infected versus uninfected  
544 individuals is  $F$ , irrespective of the mtDNA haplotype of the uninfected individuals. As shown in

545 Appendix 1, the frequency of the ancestral mtDNA haplotype among uninfected individuals,  
546 denoted  $r_t$ , declines as

547

$$548 \quad r_{t+1} = r_t/[F(1 - \mu)]. \quad (3)$$

549

550 Assuming  $r_0 = 1$ , recursion (3) implies that even if  $F(1 - \mu)$  is only 1.01, the frequency of the  
551 ancestral mtDNA haplotype should fall below  $10^{-4}$  after 1000 generations. A much more rapid  
552 mtDNA turnover was seen as the CI-causing  $wRi$  swept northward through California  
553 populations of *D. simulans* (Turelli et al. 1992; Turelli and Hoffmann 1995). Thus, it is  
554 theoretically unexpected, under this simple model, that mtDNA haplotype *maII*, which seems to  
555 be ancestral in *D. mauritiana* (Rousset and Solignac 1995; Ballard 2000a), persists among  
556 *Wolbachia*-uninfected *D. mauritiana*, given that all sampled *Wolbachia*-infected individuals  
557 carry *maI*. However, spatial variation in fitnesses is one possible explanation for this  
558 polymorphism (Gliddon and Strobeck 1975), which has persisted since at least 1985.

559

## 560 DISCUSSION

### 561 ***wMau* is sister to *wNo* and diverged from group-A *Wolbachia* less than 100 mya**

562 Our phylogenetic analyses place *wMau* sister to *wNo*, in agreement with past analyses using  
563 fewer data (James and Ballard 2000; Zabalou et al. 2008; Toomey et al. 2013). The relationships  
564 we infer agree with those from recently published phylograms (Gerth and Bleidorn 2016;  
565 Lindsey et al. 2018) (Figure 1A).

566 Depending on the prior used for substitution-rate variation, we estimate that *wMau* and other  
567 group-B *Wolbachia* diverged from group-A strains about 6–46 mya. This is roughly consistent  
568 with a prior estimate using only *ftsZ* (58–67 mya, Werren et al. 1995), but is inconsistent with a  
569 recent estimate using 179,763 bases across 252 loci (76–460 mya, Gerth and Bleidorn 2016).  
570 There are several reasons why we question the Gerth and Bleidorn (2016) calibration. First,  
571 Gerth and Bleidorn (2016)'s chronogram placed *wNo* sister to all other group-B *Wolbachia*, in  
572 disagreement with their own phylogram (Gerth and Bleidorn 2016, Figure 3). In contrast, our  
573 phylogram and that of Lindsey et al. (2018) support *wAlbB* splitting from all other strains at this  
574 node. Second, the Gerth and Bleidorn (2016) calibration estimated the split between *wRi* that  
575 infects *D. simulans* and *wSuz* that infects *D. sukukii* at 900,000 years. This estimate is more than

576 an order of magnitude higher than ours (16,214 years) and nearly two orders of magnitude higher  
577 than the 11,000 year estimate of Turelli et al. (2018) who found 0.014% third position  
578 divergence between  $w_{\text{Ri}}$  and  $w_{\text{Suz}}$  (i.e., 0.007% along each branch) over 506,307 bases.  
579 Raychoudhury et al. (2009) and Richardson et al. (2012) both estimated a rate of about  $7 \times 10^{-9}$   
580 substitutions/ $3^{\text{rd}}$  position site/year between *Wolbachia* in *Nasonia* wasps and within  $w_{\text{Mel}}$ ,  
581 respectively. An estimate of 900,000 years requires a rate about 100 times slower,  $7.8 \times 10^{-11}$   
582 substitutions/ $3^{\text{rd}}$  position site/year, which seems implausible. Finally, using data kindly provided  
583 by Michael Gerth, additional analyses indicate that the third-position rates required for the  
584 *Wolbachia* divergence times estimated by Gerth and Bleidorn (2016) between *Nomada flava* and  
585 *N. leucophthalma* ( $1.72 \times 10^{-10}$ ), *N. flava* and *N. panzeri* ( $3.78 \times 10^{-10}$ ) (their calibration point),  
586 and *N. flava* and *N. ferruginata* ( $4.14 \times 10^{-10}$ ) are each more than 10 times slower than those  
587 estimated by Raychoudhury et al. (2009) and Richardson et al. (2012), which seems unlikely.  
588 Our analyses suggest that the A-B group split occurred less than 100 mya.

589

#### 590 **The lack of CI is consistent with intermediate $w_{\text{Mau}}$ infection frequencies**

591 Across 671 genes (682,494 bases), the  $w_{\text{Mau}}$  genomes were identical and differed from  $w_{\text{No}}$  by  
592 only 0.068%. Across the coding regions we analyzed, we found few SNVs and no CNVs among  
593  $w_{\text{Mau}}$  variants. Our analyses did identify four large deletions shared by all  $w_{\text{Mau}}$  genomes,  
594 relative to  $w_{\text{No}}$ . Despite the close relationship between  $w_{\text{Mau}}$  and  $w_{\text{No}}$ ,  $w_{\text{No}}$  causes CI while  
595  $w_{\text{Mau}}$  does not (Giordano et al. 1995; Merçot et al. 1995; Rousset and Solignac 1995, our data).  
596 We searched for all pairs of loci known to cause CI and found only homologs to the *cinA*-  
597 *cinB* <sup>$w_{\text{No}}$</sup>  pair in  $w_{\text{Mau}}$  genomes. All  $w_{\text{Mau}}$  variants share a one-base-pair deletion in the  $w_{\text{Mau}}$   
598 region homologous to *cinB* <sup>$w_{\text{No}}$</sup> . This mutation introduces a frameshift and more than ten stop  
599 codons. Future functional work will help determine if disruption of this predicted-toxin locus  
600 underlies the lack of CI in  $w_{\text{Mau}}$ . Regardless, the lack of CI is consistent with the prediction that  
601 selection within host lineages does not directly act on the intensity of CI (Prout 1994; Turelli  
602 1994). We predict that analysis of additional non-CI-causing strains will reveal additional  
603 examples of genomic remnants of CI loci. Among non-CI *Wolbachia*, the relative frequency of  
604 those with non-functional CI loci, versus no CI loci, is unknown.

605 Irrespective of whether CI was lost or never gained, non-CI *Wolbachia* have lower expected  
606 equilibrium infection frequencies than do CI-causing variants (Kriesner et al. 2016). The  $w_{\text{Mau}}$

607 infection frequency of approximately 0.34 on Mauritius (Giordano et al. 1995; our data) is  
608 consistent with this prediction. Additional sampling of Mauritius, preferably over decades, will  
609 determine whether intermediate *w*Mau frequencies are temporally stable. Such temporal stability  
610 depends greatly on values of  $F$  and  $\mu$  through time suggesting additional field-based estimates of  
611 these parameters will be useful.

612 *w*Mau co-occurs with essentially the same mitochondrial haplotype as *w*Ma that infects *D.*  
613 *simulans* on Madagascar and elsewhere in Africa and the South Pacific (Rousset and Solignac  
614 1995; Merçot and Poinot 1998; Ballard 2000a; James and Ballard 2000; James et al. 2002;  
615 Ballard 2004), suggesting that *w*Mau and *w*Ma may be the same strain infecting different host  
616 species following introgressive *Wolbachia* transfer (see below). *w*Mau and *w*Ma phenotypes are  
617 also more similar to one another than to *w*No, with only certain crosses between *w*Ma-infected  
618 *D. simulans* males and uninfected *D. simulans* females inducing CI (James and Ballard 2000).  
619 Polymorphism in the strength of CI induced by *w*Ma could result from host modification of  
620 *Wolbachia*-induced CI (Reynolds and Hoffmann 2002; Cooper et al. 2017), or from *Wolbachia*  
621 titer variation that influences the strength of CI and/or the strength of CI rescue by infected  
622 females. Alternatively, the single-base-pair deletion in the *cinB*<sup>*w*No</sup> homolog or other mutations  
623 that influence CI strength, could be polymorphic in *w*Ma. *w*Ma infection frequencies in *D.*  
624 *simulans* are intermediate on Madagascar (infection frequency = 0.25, binomial confidence  
625 intervals: 0.14, 0.40; James and Ballard 2000), consistent with no CI, suggesting replication of  
626 rarely observed *w*Ma CI is needed. Including *D. simulans* from the island of Réunion in this  
627 infection-frequency further supports the conjecture that *w*Ma causes little or no CI (infection  
628 frequency = 0.31, binomial confidence intervals: 0.20, 0.45; James and Ballard 2000).  
629 Unfortunately, no Madagascar *D. simulans* stocks available at the National *Drosophila* Species  
630 Stock Center were *w*Ma infected, precluding detailed analysis of this strain.

631 Our genomic data indicate that *w*Mau may maintain an ability to rescue CI, as the *cinA*<sup>*w*No</sup>  
632 homolog is intact in *w*Mau genomes with only one nonsynonymous substitution relative to  
633 *cinA*<sup>*w*No</sup>; *cidA* in *w*Mel was recently shown to underlie transgenic-CI rescue (Shropshire et al.  
634 2018). *w*Ma seems to sometimes rescue CI, but conflicting patterns have been found, and  
635 additional experiments are needed to resolve this (Rousset and Solignac 1995; Bourtzis et al.  
636 1998; Merçot and Poinot 1998; James and Ballard 2000; Merçot and Poinot 2003; Zabalou et  
637 al. 2008). Future work that tests for CI rescue by *w*Mau and *w*Ma-infected females crossed with



638 males infected with *w*No or other CI-causing strains, combined with genomic analysis of CI loci  
639 in *w*Ma, will be useful.

640

#### 641 ***w*Mau does not influence *D. mauritiana* fecundity**

642 While selection does not directly act on the level of CI (Prout 1994; Turelli 1994; Haygood and  
643 Turelli 2009), it does act to increase the product *Wolbachia*-infected host fitness and the  
644 efficiency of maternal transmission (Turelli 1994). Understanding the *Wolbachia* effects that  
645 lead to spread from low frequencies and the persistence of non-CI causing *Wolbachia* at  
646 intermediate frequencies is crucial to explaining *Wolbachia* prevalence among insects and other  
647 arthropods. The four-fold fecundity effect of *w*Mau reported by Fast et al. (2011) in *D.*  
648 *mauritiana* is inconsistent with our experiments and with the intermediate infection frequencies  
649 observed in nature. We find no *w*Mau effects on host fecundity, regardless of host background,  
650 with our estimates of *F* having BCa intervals that include 1. Small increases in *F* could allow the  
651 deterministic spread of *w*Mau from low frequencies, although detecting very small increases in *F*  
652 is difficult (Supplemental Figure 1B). Our results are consistent with an earlier analysis that  
653 assessed egg lay of a single genotype and found no effect of *w*Mau on host fecundity (Giordano  
654 et al. 1995). When combined with the low observed infection frequencies, our fecundity data are  
655 also consistent with our mathematical analyses indicating that *Wolbachia* can increase host  
656 fitness by at most about 50% for reasonable estimates of  $\mu$ . Because fecundity is one of many  
657 fitness components, analysis of other candidate phenotypes for aiding the spread of low-  
658 frequency *Wolbachia* is needed.

659

#### 660 **Introgressive *Wolbachia* transfer likely predominates in the *D. simulans* clade**

661 Hybridization and introgression in the *D. simulans* clade may have led to introgressive transfer  
662 of *Wolbachia* among host species (Rousset and Solignac 1995). This has been observed in other  
663 *Drosophila* (Turelli et al. 2018; Cooper et al. 2019) and *Nasonia* wasps (Raychoudhury et al.  
664 2009). The number of *Wolbachia* strains in the *D. simulans* clade, and the diversity of  
665 mitochondria they co-occur with, is complex. Figure 5A shows host relationships and Figure 5B  
666 shows mitochondrial relationships, with co-occurring *Wolbachia* variants in parentheses. While  
667 *D. mauritiana* is singly infected by *w*Mau, *D. simulans* is infected by several strains, including  
668 CI-causing *w*Ha and *w*No that often co-occur as double infections within individuals (O'Neill

669 and Karr 1990; Merçot et al. 1995; Rousset and Solignac 1995). *w*Ha and *w*No are similar to  
 670 *w*Sh and *w*Sn, respectively, that infect *D. sechellia* (Giordano et al. 1995; Rousset and Solignac  
 671 1995). *w*Ha and *w*Sh also occur as single infections in *D. simulans* and in *D. sechellia*,  
 672 respectively (Rousset and Solignac 1995). In contrast, *w*No almost always co-occurs with *w*Ha in  
 673 doubly infected *D. simulans* individuals (James et al. 2002), and *w*Sn seems to occur only with  
 674 *w*Sh (Rousset and Solignac 1995). *D. simulans* has three distinct mitochondrial haplotypes (*si*I,  
 675 *si*II, *si*III) associated with *w*Au/*w*Ri (*si*II), *w*Ha/*w*No (*si*I), and *w*Ma (*si*III). The *si*I haplotype is  
 676 closely related to the *se* haplotype found with *w*Sh and *w*Sn in *D. sechellia* (Ballard 2000b). *w*Ma  
 677 co-occurs with the *si*III haplotype, which differs over its 13 protein-coding genes by only a  
 678 single-base pair from the *ma*I mitochondrial haplotype carried by *w*Mau-infected *D. mauritiana*.  
 679 A second haplotype (*ma*II) is carried by only uninfected *D. mauritiana* (Ballard 2000a; James  
 680 and Ballard 2000).  
 681

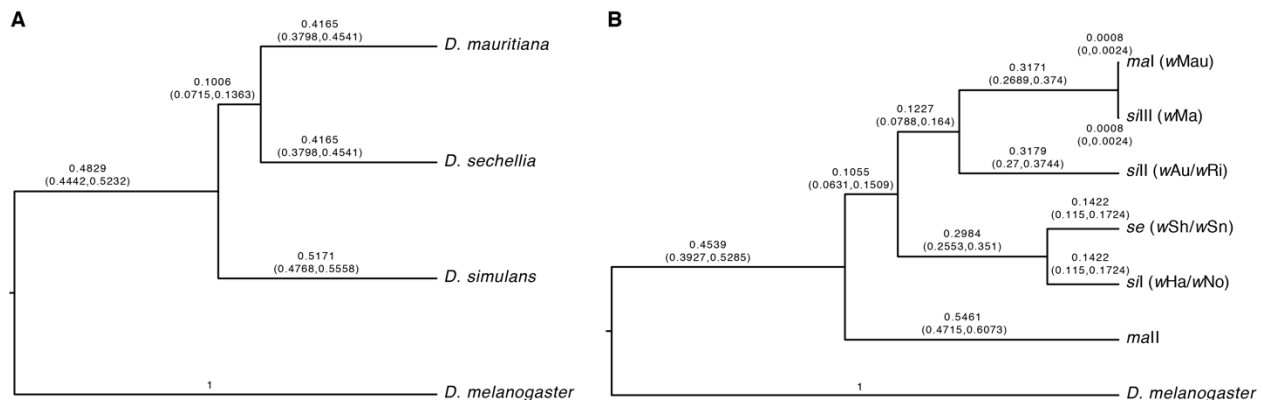

682  
 683 **Figure 5. A)** A nuclear relative chronogram. **B)** A mitochondrial relative chronogram with co-  
 684 occurring *Wolbachia* strains listed in parentheses. See the text for an interpretation of the results,  
 685 including the artifactual resolution of the phylogeny of the *D. simulans* clade.  
 686

687  
 688 The lack of whole *w*Ma genome data precludes us from confidently resolving the mode of  
 689 *w*Mau acquisition in *D. mauritiana*. However, mitochondrial relationships support the proposal  
 690 of Ballard (2000b) that *D. mauritiana* acquired *w*Mau and the *ma*I mitochondrial haplotype via  
 691 introgression from *w*Ma-infected *D. simulans* carrying *si*III. *D. mauritiana* mitochondria are  
 692 paraphyletic relative to *D. sechellia* and *D. simulans* mitochondria (Solignac and Monnerot  
 693 1986; Satta and Takahata 1990; Ballard 2000a, 2000b), with *ma*I sister to *si*III and *ma*II outgroup  
 694 to all other *D. simulans*-clade haplotypes (see Figure 5). Of the nine genomes we assessed, all

695 but one (uninfected-*R44*) carry the *maI* haplotype, and genotypes carrying *maI* are both *wMau*-  
696 infected ( $N = 5$ ) and uninfected ( $N = 3$ ). While *wMa*-infected *D. simulans* carry *siIII*, *wNo*-  
697 infected *D. simulans* carry *siI*. We estimate that *wMau* and *wNo* diverged about 55,000 years  
698 ago, with only 0.068% sequence divergence over 682,494 bp. Nevertheless, it seems implausible  
699 that *wNo* (versus *wMa*) was transferred directly to *D. mauritiana* as this requires horizontal or  
700 paternal transmission of *wNo* into a *D. mauritiana* background already carrying the *maI*  
701 mitochondrial haplotype. Although our nuclear result suggests a confident phylogenetic  
702 resolution of the *D. simulans* clade (Figure 5A), this is an artifact of the bifurcation structure  
703 imposed by the phylogenetic analysis. Population genetic analyses show a complex history of  
704 introgression and probable shared ancestral polymorphisms (Kliman et al. 2000) among these  
705 three species. Consistent with this, of the 20 nuclear loci we examined, 6 (*aconitase*, *aldolase*,  
706 *bicoid*, *ebony*, *enolase*, *ninaE*) supported *D. mauritiana* as the outgroup within the *D. simulans*  
707 clade, 7 (*glyp*, *pepck*, *pgm*, *pic*, *ptc*, *transaldolase*, *wingless*) supported *D. sechellia* as the  
708 outgroup, and 7 (*esc*, *g6pdh*, *glys*, *pgi*, *tpi*, *white*, *yellow*) supported *D. simulans*. With successive  
709 invasions of the islands and purely allopatric speciation, we expect the outgroup to be the island  
710 endemic that diverged first. Figure 5B indicates that the *maII* haplotype diverged from the other  
711 mtDNA haplotypes roughly when the clade diverged, with the other haplotypes subject to a  
712 complex history of introgression and *Wolbachia*-associated sweeps, as described by Ballard  
713 (2000b).

714 Ballard (2000b) estimated that *siIII-maI* diverged about 4,500 years ago, which presumably  
715 approximates the date of the acquisition of *wMau* (and *siIII*, which became *maI*) by *D.*  
716 *mauritiana*. This is surely many thousands of generations given previous estimates that consider  
717 the temperature dependence of *Drosophila* development (Cooper et al. 2014; Cooper et al. 2018).  
718 As shown by our mathematical analyses (Eq. 3), the apparent persistence of the *maII* mtDNA  
719 among *Wolbachia*-uninfected *D. mauritiana*—without its occurrence among infected  
720 individuals—is unexpected. More extensive sampling of natural *D. mauritiana* populations is  
721 needed to see if this unexpected pattern persists. The persistence of this haplotype is inconsistent  
722 with simple null models, possibly indicating interesting fitness effects.

723 While paternal transmission has been observed in *D. simulans* (Hoffmann and Turelli 1988;  
724 Turelli and Hoffmann 1995), it seems to be very rare (Richardson et al. 2012; Turelli et al.  
725 2018). *wNo* almost always occurs in *D. simulans* individuals also infected with *wHa*,

726 complicating this scenario further. It is possible that horizontal or paternal transmission of *w*Ma  
727 or *w*No between *D. simulans* backgrounds carrying different mitochondrial haplotypes underlies  
728 the similarities of these strains within *D. simulans*, despite their co-occurrence with distinct  
729 mitochondria. Given the diversity of *Wolbachia* that infect *D. simulans*-clade hosts, and known  
730 patterns of hybridization and introgression among hosts (Garrigan et al. 2012; Brand et al. 2013;  
731 Garrigan et al. 2014; Matute and Ayroles 2014; Schrider et al. 2018), determining relationships  
732 among these *Wolbachia* and how *D. mauritiana* acquired *w*Mau will require detailed  
733 phylogenomic analysis of nuclear, mitochondrial, and *Wolbachia* genomes in the *D. simulans*  
734 clade.

735

### 736 **AUTHOR CONTRIBUTIONS**

737 MM performed the molecular and phenotypic work, participated in the design of the study, and  
738 contributed to the writing; WC performed the phylogenetic and genomic analyses and  
739 contributed to the writing; SR contributed to the molecular and phenotypic analyses and to the  
740 writing; JB performed the library preparation and contributed to the writing; MT contributed to  
741 the analyses, data interpretation, and writing; BSC designed and coordinated the study,  
742 contributed to the analyses and data interpretation, and drafted the manuscript. All authors gave  
743 final approval for publication.

744

### 745 **ACKNOWLEDGMENTS**

746 We thank Margarita Womack for sampling the *D. mauritiana* used in this study and Daniel  
747 Matute for sharing them. We thank Michael Gerth for sharing *Nomada* genomic data. Isaac  
748 Humble, Maria Kirby, and Tim Wheeler assisted with data collection. Michael Gerth, Michael  
749 Hague, and Amelia Lindsey provided comments that improved earlier drafts of this manuscript.  
750 Computational resources were provided by the University of Montana Genomics Core. Research  
751 reported in this publication was supported by the National Institute Of General Medical Sciences  
752 of the National Institutes of Health (NIH) under Award Number R35GM124701 to B.S.C. The  
753 content is solely the responsibility of the authors and does not necessarily represent the official  
754 views of the NIH. The authors declare no conflicts of interest.

755

756

757 **LITERATURE CITED**

- 758 Baldo, L., N. A. Ayoub, C. Y. Hayashi, J. A. Russell, J. K. Stahlhut, and J. H. Werren. 2008  
759 Insight into the routes of *Wolbachia* invasion: high levels of horizontal transfer in the  
760 spider genus *Agelenopsis* revealed by *Wolbachia* strain and mitochondrial DNA  
761 diversity. *Molecular Ecology* 17:557–569.
- 762 Ballard, J. W. O. 2000a. When one is not enough: introgression of mitochondrial DNA in  
763 *Drosophila*. *Molecular Biology and Evolution* 17:1126–1130.
- 764 Ballard, J. W. 2000b. Comparative genomics of mitochondrial DNA in *Drosophila simulans*.  
765 *Journal of Molecular Evolution* 51:64–75.
- 766 Ballard, J. W. O. 2004. Sequential evolution of a symbiont inferred from the host: *Wolbachia*  
767 and *Drosophila simulans*. *Molecular Biology and Evolution* 21:428–442.
- 768 Ballard, J. W., and R. G. Melvin. 2007. Tetracycline treatment influences mitochondrial  
769 metabolism and mtDNA density two generations after treatment in *Drosophila*. *Insect*  
770 *Molecular Biology* 16:799–802.
- 771 Barton, N. H., and M. Turelli. 2011. Spatial waves of advance with bistable dynamics:  
772 cytoplasmic and genetic analogues of allee effects. *American Naturalist* 178:E48–E75.
- 773 Beckmann, J. F., and A. M. Fallon. 2013. Detection of the *Wolbachia* protein WPIP0282 in  
774 mosquito spermathecae: implications for cytoplasmic incompatibility. *Insect*  
775 *Biochemistry and Molecular Biology* 43:867–878.
- 776 Beckmann, J. F., J. A. Ronau and M. Hochstrasser. 2017. A *Wolbachia* deubiquitylating enzyme  
777 induces cytoplasmic incompatibility. *Nature Microbiology* 2:17007.
- 778 Beckmann, J. F., M. Bonneau, H. Chen, M. Hochstrasser, D. Poinot, H. Merçot, M. Weill, M.  
779 Sicard, and S. Charlat. 2019. The toxin-antidote model of cytoplasmic incompatibility:  
780 genetics and evolutionary implications. *Trends in Genetics* in press.
- 781 Boeva, V., T. Popova, K. Bleakley, P. Chiche, J. Cappo, G. Schleiermacher, I. Janoueix-Lerosey,  
782 O. Delattre, E. Barillot. 2012. Control-FREEC: a tool for assessing copy number and  
783 allelic content using next-generation sequencing data. *Bioinformatics* 28:423–425.
- 784 Bourtzis, K., S. L. Dobson, H. R. Braig and S. L. O'Neill. 1998. Rescuing *Wolbachia* have been  
785 overlooked. *Nature* 391:852–853.
- 786 Brand, C. L., S. B. Kingan, L. Wu and D. Garrigan. 2013. A Selective Sweep across Species  
787 Boundaries in *Drosophila*. *Molecular Biology and Evolution* 30:2177–2186.
- 788 Brownlie, J. C., B. N. Cass, M. Riegler, J. J. Witsenburg, I. Iturbe-Ormaetxe, E. A. McGraw, S.  
789 L. O'Neill. 2009. Evidence for Metabolic Provisioning by a Common Invertebrate  
790 Endosymbiont, *Wolbachia pipientis*, during Periods of Nutritional Stress. *PLoS*  
791 *Pathogens* 5:e1000368.
- 792 Carrington, L. B., J. R. Lipkowitz, A. A. Hoffmann, and M. Turelli. 2011. A re-examination of  
793 *Wolbachia*-induced cytoplasmic incompatibility in California *Drosophila simulans*. *PLoS*  
794 *ONE* 6:e22565
- 795 Caspari, E., and G. S. Watson. 1959. On the evolutionary importance of cytoplasmic sterility in  
796 mosquitoes. *Evolution* 13:568–570.
- 797 Cattel, J., K. Nikolouli, T. Andrieux, J. Martinez, F. Jiggins, S. Charlat, F. Vavre, D. Lejon, P.  
798 Gibert, and L. Mouton. 2018. Back and forth *Wolbachia* transfers reveal efficient strains  
799 to control spotted wing *Drosophila* populations. *Journal of Applied Ecology* 55:2408-  
800 2418.
- 801

- 802 Conner, W. R., M. L. Blaxter, G. Anfora, L. Ometto, O. Rota-Stabelli, and M. Turelli. 2017.  
803 Genome comparisons indicate recent transfer of *w*Ri-like *Wolbachia* between sister  
804 species *Drosophila suzukii* and *D. subpulchrella*. *Ecology and Evolution* 7:9391–9404.
- 805 Cooper, B. S., L. A. Hammad, and K. L. Montooth. 2014. Thermal adaptation of cellular  
806 membranes in natural populations of *Drosophila melanogaster*. *Functional Ecology*.  
807 28:886-894.
- 808 Cooper, B. S., P. S. Ginsberg, M. Turelli and D. R. Matute. 2017. *Wolbachia* in the *Drosophila*  
809 *yakuba* complex: pervasive frequency variation and weak cytoplasmic incompatibility,  
810 but no apparent effect on reproductive isolation. *Genetics* 205:333–351.
- 811 Cooper, B. S., A. Sedghifar, W. T. Nash, A. A. Comeault, D. R. Matute. 2018. A maladaptive  
812 combination of traits contributes to the maintenance of a *Drosophila* hybrid zone. *Current*  
813 *Biology*. 28:2940-2947.
- 814 Cooper, B. S., D. Vanderpool, W. R. Conner, D. R. Matute, and M. Turelli. 2019. Introgressive  
815 and horizontal acquisition of *Wolbachia* by *Drosophila yakuba*-clade hosts and horizontal  
816 transfer of incompatibility loci between distantly related *Wolbachia*. bioRxiv.  
817 doi.org/10.1101/551036.
- 818 David, J., S. McEvey, M. Solignac and L. Tsacas. 1989. *Drosophila* communities on Mauritius  
819 and the ecological niche of *D. mauritiana* (Diptera, Drosophilidae). *Revue De Zoologie*  
820 *Africaine – Journal of African Zoology* 103:107–116.
- 821 Dean, M. D., and J. W. Ballard. 2004. Linking phylogenetics with population genetics to  
822 reconstruct the geographic origin of a species. *Molecular Phylogenetics and Evolution*  
823 32:998–1009.
- 824 Efron, B., and R. Tibshirani. 1993. *An Introduction to the Bootstrap*. Chapman & Hall, New  
825 York, NY.
- 826 Ellegaard, K. M., L. Klasson, K. Näslund, K. Bourtzis and S. G. E. Andersson. 2013.  
827 Comparative Genomics of *Wolbachia* and the Bacterial Species Concept. *PLoS Genetics*  
828 9:e1003381.
- 829 Fast, E. M., M. E. Toomey, K. Panaram, D. Desjardins, E. D. Kolaczyk, H. M. Frydman. 2011.  
830 *Wolbachia* enhance *Drosophila* stem cell proliferation and target the germline stem cell  
831 niche. *Science* 334:990–992.
- 832 Fisher, R. A. 1937. The wave of advance of advantageous genes. *Annals of Eugenics* 7:355–369.
- 833 Garrigan, D., S. B. Kingan, A. J. Geneva, P. Andolfatto, A. G. Clark, K. R. Thornton, D. C.  
834 Presgraves. 2012. Genome sequencing reveals complex speciation in the *Drosophila*  
835 *simulans* clade. *Genome Research* 22:1499–1511.
- 836 Garrigan, D., S. B. Kingan, A. J. Geneva, J. P. Vedanayagam and D. C. Presgraves. 2014.  
837 Genome diversity and divergence in *Drosophila mauritiana*: multiple signatures of faster  
838 X evolution. *Genome Biology and Evolution* 6:2444–2458.
- 839 Gerth, M., and C. Bleidorn. 2016. Comparative genomics provides a timeframe for *Wolbachia*  
840 evolution and exposes a recent biotin synthesis operon transfer. *Nature Microbiology*  
841 2:16241.
- 842 Giordano, R., S. L. O'Neill and H. M. Robertson. 1995. *Wolbachia* infections and the expression  
843 of cytoplasmic incompatibility in *Drosophila sechellia* and *D. mauritiana*. *Genetics*  
844 140:1307–1317.
- 845 Gliddon, C. and C. Strobeck. 1975. Necessary and sufficient conditions for multiple-niche  
846 polymorphism in haploids. *American Naturalist* 109:233–235.

- 847 Gloor, G. B., C. R. Preston, D. M. Johnsonschlitz, N. A. Nassif, R. W. Phillis, W. K. Benz, H.  
848 M. Robertson, W. R. Engels. 1993. Type-1 repressors of P-element mobility. *Genetics*  
849 135:81–95.
- 850 Gupta, V., R. B. Vasanthakrishnan, J. Siva-Jothy, K. M. Monteith, S. P. Brown, and P. F. Vale.  
851 2017. The route of infection determines *Wolbachia* antibacterial protection in  
852 *Drosophila*. *Proceedings of the Royal Society B: Biological Sciences* 284:20170809.
- 853 Hamm, C. A., D. J. Begun, A. Vo, C. C. R. Smith, P. Saelao, A. O. Shaver, J. Jaenike, M.  
854 Turelli. 2014. *Wolbachia* do not live by reproductive manipulation alone: infection  
855 polymorphism in *Drosophila suzukii* and *D. subpulchrella*. *Molecular Ecology* 23:4871–  
856 4885.
- 857 Haygood, R., and M. Turelli. 2009. Evolution of incompatibility-inducing microbes in  
858 subdivided host populations. *Evolution* 63:432–447
- 859 Hedges, L. M., J. C. Brownlie, S. L. O'Neill and K. N. Johnson. 2008. *Wolbachia* and virus  
860 protection in insects. *Science* 322:702.
- 861 Hilgenboecker, K., P. Hammerstein, P. Schlattmann, A. Telschow and J. H. Werren. 2008. How  
862 many species are infected with *Wolbachia*? A statistical analysis of current data. *FEMS*  
863 *Microbiology Letters* 281:215–220.
- 864 Hoffmann, A. A., M. Turelli, and G. M. Simmons. 1986. Unidirectional incompatibility between  
865 populations of *Drosophila simulans*. *Evolution* 40:692–701.
- 866 Hoffmann, A. A., and M. Turelli. 1988. Unidirectional incompatibility in *Drosophila simulans*:  
867 Inheritance, geographic variation and fitness effects. *Genetics* 119:435–444.
- 868 Hoffmann, A. A., and M. Turelli. 1997. Cytoplasmic incompatibility in insects. In *Influential*  
869 *passengers: inherited microorganisms and arthropod reproduction*, edited by S. L.  
870 O'Neill, J. H. Werren, and A. A. Hoffmann. Oxford University Press, pp. 42–80.
- 871 Hoffmann, A. A., D. Clancy and J. Duncan. 1996. Naturally-occurring *Wolbachia* infection in  
872 *Drosophila simulans* that does not cause cytoplasmic incompatibility. *Heredity* 76:1–8.
- 873 Hoffmann, A. A., M. Hercus and H. Dagher. 1998. Population dynamics of the *Wolbachia*  
874 infection causing cytoplasmic incompatibility in *Drosophila melanogaster*. *Genetics*  
875 148:221–231.
- 876 Hoffmann, A. A., M. Turelli, and L. G. Harshman. 1990. Factors affecting the distribution of  
877 cytoplasmic incompatibility in *Drosophila simulans*. *Genetics* 126:933–948.
- 878 Hoffmann, A. A., B. L. Montgomery, J. Popovici, I. Iturbe-Ormaetxe, P. H. Johnson, F. Muzzi,  
879 M. Greenfield, M. Durkan, Y. S. Leong, Y. Dong, H. Cook, J. Axford, A. G. Callahan, N.  
880 Kenny, C. Omodei, E. A. McGraw, P. A. Ryan, S. A. Ritchie, M. Turelli, and S. L.  
881 O'Neill. 2011. Successful establishment of *Wolbachia* in *Aedes* populations to suppress  
882 dengue transmission. *Nature* 476:454–457.
- 883 Höhna, S., M. J. Landis, T. A. Heath, B. Boussau, N. Lartillot, B. R. Moore, J. P. Huelsenbeck,  
884 F. Ronquist. 2016. RevBayes: Bayesian Phylogenetic Inference Using Graphical Models  
885 and an Interactive Model-Specification Language. *Systematic Biology*. 65:726–736.
- 886 Hornett, E. A., S. Charlat, A. M. R. Duploux, N. Davies, G. K. Roderick, N. Wedell, and G. D.  
887 D. Hurst. 2006. Evolution of male-killer suppression in a natural population. *PLoS*  
888 *Biology* 4:e283.
- 889 Huigens, M. E., R. P. de Almeida, P. A. Boons, R. F. Luck and R. Stouthamer. 2004. Natural  
890 interspecific and intraspecific horizontal transfer of parthenogenesis-inducing *Wolbachia*  
891 in *Trichogramma* wasps. *Proceedings of the Royal Society B: Biological Sciences*  
892 271:509–515.

- 893 Hurst, G. D. D. and F. M. Jiggins. 2000. Male-killing bacteria in insects: mechanisms, incidence,  
894 and implications. *Emerging Infectious Diseases* 6:329-336.
- 895 Jackman, S. D., B. P. Vandervalk, H. Mohamadi, J. Chu, S. Yeo, S. A. Hammond, G. Jahesh, H.  
896 Khan, L. Coombe, R. L. Warren, I. Birol. 2017. ABySS 2.0: resource-efficient assembly  
897 of large genomes using a Bloom filter. *Genome Research* 27:768–777.
- 898 James, A. C., and J. W. O. Ballard. 2000. Expression of cytoplasmic incompatibility in  
899 *Drosophila simulans* and its impact on infection frequencies and distribution of  
900 *Wolbachia pipientis*. *Evolution* 54:1661–1672.
- 901 James, A. C., M. D. Dean, M. E. McMahon and J. W. Ballard. 2002. Dynamics of double and  
902 single *Wolbachia* infections in *Drosophila simulans* from New Caledonia. *Heredity*  
903 88:182–189.
- 904 Jeyaprakash, A., and M. A. Hoy. 2000. Long PCR improves *Wolbachia* DNA amplification: wsp  
905 sequences found in 76% of sixty-three arthropod species. *Insect Molecular Biology*  
906 9:393–405.
- 907 Joshi, N. A., and J. N. Fass. 2011. Sickle: A sliding-window, adaptive, quality-based trimming  
908 tool for FastQ files (Version 1.33). Available at <https://github.com/najoshi/sickle>.
- 909 Katoh, K., and D. M. Standley. 2013. MAFFT Multiple Sequence Alignment Software Version  
910 7: Improvements in Performance and Usability. *Molecular Biology and Evolution*  
911 30:772–780.
- 912 Kent, B. N., L. Salichos, J. G. Gibbons, A. Rokas, I. L. Newton, M. E. Clark, S. R. Bordenstein.  
913 2011. Complete bacteriophage transfer in a bacterial endosymbiont (*Wolbachia*)  
914 determined by targeted genome capture. *Genome Biology and Evolution* 3:209–218.
- 915 Klasson, L., T. Walker, M. Sebahia, M. J. Sanders, M. A. Quail, A. Lord, S. Sanders, J. Earl, S.  
916 L. O’Neill, N. Thomson, S. P. Sinkins, J. Parkhill. 2008. Genome evolution of *Wolbachia*  
917 strain *w*Pip from the *Culex pipiens* group. *Molecular Biology and Evolution* 25:1877–  
918 1887.
- 919 Klasson, L., J. Westberg, P. Sapountzis, K. Näslund, Y. Lutnaes, A. C. Darby, Z. Veneti, L.  
920 Chen, H. R. Braig, and R. Garrett. 2009. The mosaic genome structure of the *Wolbachia*  
921 *w*Ri strain infecting *Drosophila simulans*. *Proceedings of the National Academy of*  
922 *Sciences* 106:5725–5730.
- 923 Kliman, R. M., P. Andolfatto, J. A. Coyne, F. Depaulis, M. Kreitman, A. J. Berry, J. McCarter, J.  
924 Wakeley, and J. Hey. 2000. The population genetics of the origin and divergence of the  
925 *Drosophila simulans* species complex. *Genetics* 156:1913–1931.
- 926 Kriesner, P., and A. A. Hoffmann. 2018. Rapid spread of a *Wolbachia* infection that does not  
927 affect host reproduction in *Drosophila simulans* cage populations. *Evolution* 72:1475–  
928 1487.
- 929 Kriesner, P., W. R. Conner, A. R. Weeks, M. Turelli, and A. A. Hoffmann. 2016. Persistence of  
930 a *Wolbachia* infection frequency cline in *Drosophila melanogaster* and the possible role  
931 of reproductive dormancy. *Evolution* 70:979–997.
- 932 Kriesner, P., A. A. Hoffmann, S. F., Lee, M. Turelli, and A. R. Weeks. 2013. Rapid sequential  
933 spread of two *Wolbachia* variants in *Drosophila simulans*. *PLoS Pathogens* 9:e1003607.
- 934 Lachaise, D., J. R. David, F. Lemeunier, L. Tsacas and M. Ashburner. 1986. The reproductive  
935 relationships of *Drosophila sechellia* with *D. mauritiana*, *D. simulans*, and *D.*  
936 *melanogaster* from the Afrotropical region. *Evolution* 40:262–271.
- 937 Laven, H. 1951. Crossing Experiments with *Culex* Strains. *Evolution* 5:370-375.



- 938 Legrand, D., T. Chenel, C. Campagne, D. Lachaise and M. L. Cariou. 2011. Inter-island  
939 divergence within *Drosophila mauritiana*, a species of the *D. simulans* complex: Past  
940 history and/or speciation in progress? *Molecular Ecology* 20:2787–2804.
- 941 LePage, D. P., J. A. Metcalf, S. R. Bordenstein, J. On, J. I. Perlmutter, J. D. Shropshire, E. M.  
942 Layton, L. J. Funkhouser-Jones, J. F. Beckmann, S. R. Bordenstein. 2017. Prophage WO  
943 genes recapitulate and enhance *Wolbachia*-induced cytoplasmic incompatibility. *Nature*  
944 543:243–247.
- 945 Li, H., and R. Durbin. 2009. Fast and accurate short read alignment with Burrows-Wheeler  
946 transform. *Bioinformatics* 25:1754–1760.
- 947 Lindsey, A. R. I., D. W. Rice, S. R. Bordenstein, A. W. Brooks, S. R. Bordenstein, A. W.  
948 Brooks, S. R. Bordenstein, I. L. Newton. 2018. Evolutionary Genetics of Cytoplasmic  
949 Incompatibility Genes *cifA* and *cifB* in Prophage WO of *Wolbachia*. *Genome Biology*  
950 and Evolution 10:434–451.
- 951 Lindsey, A. R. I., J. H. Werren, S. Richards and R. Stouthamer. 2016. Comparative Genomics of  
952 a Parthenogenesis-Inducing *Wolbachia* Symbiont. *Genes|Genomes|Genetics*. 6:2113–  
953 2123.
- 954 Martinez, J., B. Longdon, S. Bauer, Y.-S. Chan, W. J. Miller, K. Bourtzia, L. Teixeira, F. M.  
955 Jiggins. 2014. Symbionts commonly provide broad spectrum resistance to viruses in  
956 insects: A comparative analysis of *Wolbachia* strains. *PLoS Pathogens* 10:e1004369.
- 957 Matute, D. R., and J. F. Ayroles. 2014. Hybridization occurs between *Drosophila simulans* and  
958 *D. sechellia* in the Seychelles archipelago. *Journal of Evolutionary Biology* 27:1057–  
959 1068.
- 960 Mavingui, P., C. Valiente Moro, V. Tran-Van, F. Wisniewski-Dye, V. Raquin, G. Minard, F. H.  
961 Tran, D. Voronin, Z. Rouy, P. Bustos, L. Lozano, V. Barbe, V. Gonzalez. 2012. Whole-  
962 genome sequence of *Wolbachia* strain wAlbB, an endosymbiont of tiger mosquito vector  
963 *Aedes albopictus*. *Journal of Bacteriology* 194:1840.
- 964 McDermott, S. R., and R. M. Kliman. 2008. Estimation of isolation times of the island species in  
965 the *Drosophila simulans* complex from multilocus DNA sequence data. *PLoS One*  
966 3:e2442.
- 967 Merçot, H., and D. Poinot. 1998. ...and discovered on Mount Kilimanjaro. *Nature* 391:853.
- 968 Merçot, H., and D. Poinot. 2003. *Wolbachia* transmission in a naturally bi-infected *Drosophila*  
969 *simulans* strain from New-Caledonia. *Entomologia Experimentalis et Applicata* 86:97–  
970 103.
- 971 Merçot, H., B. Llorente, M. Jacques, A. Atlan and C. Montchamp-Moreau. 1995. Variability  
972 within the Seychelles cytoplasmic incompatibility system in *Drosophila simulans*.  
973 *Genetics* 141:1015–1023.
- 974 Nunes, M. D., P. O. Wengel, M. Kreissl and C. Schlotterer. 2010. Multiple hybridization events  
975 between *Drosophila simulans* and *Drosophila mauritiana* are supported by mtDNA  
976 introgression. *Molecular Ecology* 19:4695–4707.
- 977 Ochman, H., and A. C. Wilson. 1987. Evolution in bacteria: evidence for a universal substitution  
978 rate in cellular organisms. *Journal of Molecular Evolution* 26:74–86.
- 979 O'Neill, S. L., R. Giordano, A. M. Colbert, T. L. Karr and H. M. Robertson. 1992. 16S rRNA  
980 phylogenetic analysis of the bacterial endosymbionts associated with cytoplasmic  
981 incompatibility in insects. *Proceedings of the National Academy of Sciences* 89:2699–  
982 2702.

- 983 O'Neill, S. L., and T. L. Karr. 1990. Bidirectional incompatibility between conspecific  
984 populations of *Drosophila simulans*. *Nature* 348:178–180.
- 985 Pinto, S. B., K. Stainton, S. Harris, Z. Kambris, E. R. Sutton, M. B. Bonsall, J. Parkhill, S. P.  
986 Sinkins. 2013. Transcriptional regulation of *Culex pipiens* mosquitoes by *Wolbachia*  
987 influences cytoplasmic incompatibility. *PLoS Pathogens* 9:e1003647.
- 988 Poinot, D., K. Bourtzis, G. Markakis, C. Savakis, and H. Merçot. 1998. *Wolbachia* transfer from  
989 *Drosophila melanogaster* into *D. simulans*: host effect and cytoplasmic incompatibility  
990 relationships. *Genetics* 150:227–237.
- 991 Prout, T. 1994. Some evolutionary possibilities for a microbe that causes incompatibility in its  
992 host. *Evolution* 48:909–911.
- 993 Raychoudhury, R., L. Baldo, D. C. S. G. Oliveira, and J. H. Werren. 2009. Modes of acquisition  
994 of *Wolbachia*: horizontal transfer, hybrid introgression, and codivergence in the *Nasonia*  
995 species complex. *Evolution* 63:165–183.
- 996 Reynolds, K. T., and A. A. Hoffmann. 2002. Male age, host effects and the weak expression or  
997 non-expression of cytoplasmic incompatibility in *Drosophila* strains infected by  
998 maternally transmitted *Wolbachia*. *Genetics Research* 80:79–87.
- 999 Richardson, M. F., L. A. Weinert, J. J. Welch, R. S. Linheiro, M. M. Magwire, F. M. Jiggins, C.  
1000 M. Bergman. 2012. Population genomics of the *Wolbachia* endosymbiont in *Drosophila*  
1001 *melanogaster*. *PLoS Genetics* 8:e1003129.
- 1002 Ritchie S. A. 2018. *Wolbachia* and the near cessation of dengue outbreaks in Northern Australia  
1003 despite continued dengue importations via travellers. *Journal of Travel*  
1004 *Medicine*. 25:tay084.)
- 1005 Rousset, F., and M. Solignac. 1995. Evolution of single and double *Wolbachia* symbioses during  
1006 speciation in the *Drosophila simulans* complex. *Proceedings of the National Academy of*  
1007 *Sciences* 92:6389–6393.
- 1008 Satta, Y. and N. Takahata. 1990. Evolution of *Drosophila* mitochondrial DNA and the history of  
1009 the *melanogaster* subgroup. *Proceedings of the National Academy of Sciences of the*  
1010 *United States of America* 87:9558–9562.
- 1011 Schmidt, T. L., N. H. Barton, G. Rašić, A. P. Turley, B. L. Montgomery, I. Iturbe-Ormaetxe, P.  
1012 E. Cook, P. A. Ryan, S. A. Ritchie, A. A. Hoffmann, S. L. O'Neill, and M. Turelli. 2017.  
1013 Local introduction and heterogeneous spatial spread of dengue-suppressing *Wolbachia*  
1014 through an urban population of *Aedes aegypti*. *PLoS Biology* 15:e2001894.
- 1015 Schrider, D. R., J. Ayroles, D. R. Matute and A. D. Kern. 2018. Supervised machine learning  
1016 reveals introgressed loci in the genomes of *Drosophila simulans* and *D. sechellia*. *PLoS*  
1017 *Genetics* 14:e1007341.
- 1018 Schuler, H., K. Köppler, S. Daxböck-Horvath, B. Rasool, S. Krumböck, D. Schwarz, T. S.  
1019 Hoffmeister, B. C. Schlick-Steiner, F. M. Steiner, A. Telschow, C. Stauffer, W.  
1020 Arthofer, M. Riegler. 2016. The hitchhiker's guide to Europe: the infection dynamics of  
1021 an ongoing *Wolbachia* invasion and mitochondrial selective sweep in *Rhagoletis cerasi*.  
1022 *Molecular Ecology* 25:1595–1609.
- 1023 Seemann, T. 2014. Prokka: rapid prokaryotic genome annotation. *Bioinformatics* 30:2068-2069.
- 1024 Shi, M., V. L. White, T. Schlub, J.-S. Eden, A. A. Hoffmann, E. C. Holmes. 2018. No detectable  
1025 effect of *Wolbachia* wMel on the prevalence and abundance of the RNA virome of  
1026 *Drosophila melanogaster*. *Proceedings of the Royal Society B: Biological Sciences*  
1027 285:20181165.

- 1028 Shropshire, J. D., J. On, E. M. Layton, H. Zhou and S. R. Bordenstein. 2018. One prophage WO  
1029 gene rescues cytoplasmic incompatibility in *Drosophila melanogaster*. Proceedings of the  
1030 National Academy of Sciences. 115:4987–4991.
- 1031 Simao, F. A., R. M. Waterhouse, P. Ioannidis, E. V. Kriventseva and E. M. Zdobnov. 2015.  
1032 BUSCO: assessing genome assembly and annotation completeness with single-copy  
1033 orthologs. Bioinformatics 31:3210–3212.
- 1034 Siozios, S., A. Cestaro, R. Kaur, I. Pertot, O. Rota-Stabelli, and G. Anfora. 2013. Draft genome  
1035 sequence of the *Wolbachia* endosymbiont of *Drosophila suzukii*. Genome  
1036 Announcements. 1, e00032-13.
- 1037 Solignac, M. and M. Monnerot. 1986. Race formation, speciation, and introgression within  
1038 *Drosophila simulans*, *D. mauritiana*, and *D. schellia* inferred from mitochondrial DNA  
1039 analysis. Evolution 40:531–539.
- 1040 Sutton, E. R., S. R. Harris, J. Parkhill and S. P. Sinkins. 2014. Comparative genome analysis of  
1041 *Wolbachia* strain wAu. BMC Genomics 15:928.
- 1042 Taylor, M. J., D. Voronin, K. L. Johnston and L. Ford. 2013. *Wolbachia* filarial interactions. Cell  
1043 Microbiology 15: 520–526.
- 1044 Team, R. C. 2015. R: A language and environment for statistical computing, *R Foundation for*  
1045 *Statistical Computing*, Vienna, Austria.
- 1046 Teixeira, L., A. Ferreira and M. Ashburner. 2008. The bacterial symbiont *Wolbachia* induces  
1047 resistance to RNA viral infections in *Drosophila melanogaster*. PLoS Biology  
1048 6:e1000002.
- 1049 Toomey, M. E., K. Panaram, E. M. Fast, C. Beatty and H. M. Frydman. 2013. Evolutionarily  
1050 conserved *Wolbachia*-encoded factors control pattern of stem-cell niche tropism in  
1051 *Drosophila* ovaries and favor infection. Proceedings of the National Academy of  
1052 Sciences 110:10788–10793.
- 1053 Turelli, M. 1994. Evolution of incompatibility-inducing microbes and their hosts. Evolution  
1054 48:1500–1513.
- 1055 Turelli, M. and N. H. Barton. 2017. Deploying dengue-suppressing *Wolbachia*: robust models  
1056 predict slow but effective spatial spread in *Aedes aegypti*. Theoretical Population Biology  
1057 115:45–60.
- 1058 Turelli, M. and A. A. Hoffmann. 1995. Cytoplasmic incompatibility in *Drosophila simulans*:  
1059 dynamics and parameter estimates from natural populations. Genetics 140:1319–1338.
- 1060 Turelli, M., A. A. Hoffmann, and S. W. McKechnie. 1992. Dynamics of cytoplasmic  
1061 incompatibility and mtDNA variation in natural *Drosophila simulans* populations.  
1062 Genetics 132:713–723.
- 1063 Turelli, M., B. S. Cooper, K. M. Richardson, P. S. Ginsberg, B. Peckenpaugh, C. X. Antelope, K.  
1064 J. Kim, M. R. May, A. Abrieux, D. A. Wilson, M. J. Bronski, B. R. Moore, J. J. Gao, M.  
1065 B. Eisen, J. C. Chiu, W. R. Conner, A. A. Hoffmann. 2018. Rapid Global Spread of wRi-  
1066 like *Wolbachia* across Multiple *Drosophila*. Current Biology 28:963–971.
- 1067 Vanthournout, B. and F. Hendrickx. 2016. Hidden suppression of sex ratio distortion suggests  
1068 Red queen dynamics between *Wolbachia* and its dwarf spider host. Journal of  
1069 Evolutionary Biology 29:1488-1494.
- 1070 Webster, C. L., F. M. Waldron, S. Robertson, D. Crowson, G. Ferrari, J. F. Quintana, J.-M.  
1071 Brouqui, E. H. Bayne, B. Longdon, A. H. Buck, B. P. Lazzaro, J. Akorli, P. R. Haddrill,  
1072 and D. J. Obbard. 2015. The Discovery, Distribution, and Evolution of Viruses  
1073 Associated with *Drosophila melanogaster*. PLoS Biology 13:e1002210.

- 1074 Weeks, A. R., M. Turelli, W. R. Harcombe, K. T. Reynolds, and A. A. Hoffmann. 2007. From  
1075 parasite to mutualist: rapid evolution of *Wolbachia* in natural populations of *Drosophila*.  
1076 PLoS Biology 5:e114.
- 1077 Weinert, L. A., E. V. Araujo-Jnr, M. Z. Ahmed and J. J. Welch. 2015. The incidence of bacterial  
1078 endosymbionts in terrestrial arthropods. Proceedings of the Royal Society of London B:  
1079 Biological Sciences 282:20150249.
- 1080 Werren, J. H., and D. M. Windsor. 2000. *Wolbachia* infection frequencies in insects: evidence of  
1081 a global equilibrium? Proceedings of the Royal Society B: Biological Sciences  
1082 267:1277–1285.
- 1083 Werren, J. H., W. Zhang and L. R. Guo. 1995. Evolution and phylogeny of *Wolbachia*:  
1084 reproductive parasites of arthropods. Proceedings of the Royal Society B-Biological  
1085 Sciences 261:55–63.
- 1086 Wu, M., L. V. Sun, J. Vamathevan, M. Riegler, R. Deboy, J. C. Brownlie, E. A. McGraw, W.  
1087 Martin, C. Esser, N. Ahmadinejad. 2004. Phylogenomics of the reproductive parasite  
1088 *Wolbachia pipientis* wMel: a streamlined genome overrun by mobile genetic elements.  
1089 PLoS Biology 2:e69.
- 1090 Yen, J. H. and A. R. Barr. 1971. New hypothesis of the cause of cytoplasmic incompatibility in  
1091 *Culex pipiens* L. Nature 232:657-658.
- 1092 Zabalou, S., A. Apostolaki, S. Pattas, Z. Veneti, C. Paraskevopoulos, I. Livadaras, G. Markakis,  
1093 T. Brissac, H. Merçot, K. Bourtzis. 2008. Multiple rescue factors within a *Wolbachia*  
1094 strain. Genetics 178:2145–2160.
- 1095 Zug, R., and P. Hammerstein. 2012. Still a host of hosts for *Wolbachia*: Analysis of recent data  
1096 suggests that 40% of terrestrial arthropod species are infected. PLoS ONE 7:e38544.  
1097
- 1098
- 1099
- 1100
- 1101
- 1102
- 1103
- 1104
- 1105
- 1106
- 1107
- 1108
- 1109
- 1110
- 1111

## 1112 **Appendix 1. Mathematical analyses of mtDNA and *Wolbachia* dynamics**

1113 Our analysis follows the framework developed in Turelli et al. (1992), but is simplified by the  
1114 lack of CI. We suppose that introgression introduces a cytoplasm carrying *Wolbachia* and a  
1115 novel mtDNA haplotype, denoted B. Before *Wolbachia* introduction, we assume the population  
1116 is monomorphic for mtDNA haplotype A. With imperfect maternal *Wolbachia* transmission,  
1117 uninfected individuals will be produced with mtDNA haplotype B. Without horizontal or  
1118 paternal transmission (which are very rare, Turelli et al. 2018), all *Wolbachia*-infected  
1119 individuals will carry mtDNA haplotype B. Once *Wolbachia* is introduced, uninfected  
1120 individuals can have mtDNA haplotype A or B. We assume that these three cytoplasmic types  
1121 (“cytotypes”) differ only in fecundity, and denote their respective fecundities  $F_I$ ,  $F_A$  and  $F_B$ .  
1122 Denote the frequencies of the three cytotypes among adults in generation  $t$  by  $p_{I,t}$ ,  $p_{A,t}$  and  $p_{B,t}$ ,  
1123 with  $p_{I,t} + p_{A,t} + p_{B,t} = 1$ . Without CI, the frequency dynamics are

1124

$$1125 \quad p_{I,t+1} = \frac{p_{I,t}F_I(1-\mu)}{\bar{F}}, \quad p_{A,t+1} = \frac{p_{A,t}F_A}{\bar{F}}, \quad \text{and} \quad p_{B,t+1} = \frac{p_{B,t}F_B + p_{I,t}\mu F_I}{\bar{F}}, \quad \text{with} \quad (A1)$$

1126

$$1127 \quad \bar{F} = F_I p_{I,t} + F_A p_{A,t} + F_B p_{B,t}. \quad (A2)$$

1128

1129 If the uninfected population is initially monomorphic for mtDNA haplotype A, the *Wolbachia*  
1130 infection frequency will increase when rare if and only if

1131

$$1132 \quad F_I(1-\mu) > F_A. \quad (A3)$$

1133

1134 Turelli et al. (1992) showed that if a CI-causing *Wolbachia* is introduced with a cytoplasm  
1135 that contains a novel mtDNA haplotype B, which has no effect on fitness, *Wolbachia*-uninfected  
1136 individuals will eventually all carry haplotype B. This follows because eventually all uninfected  
1137 individuals have *Wolbachia*-infected maternal ancestors. This remains true for non-CI-causing  
1138 *Wolbachia* that satisfy (A3). However, we conjectured that if the introduced B mtDNA is  
1139 deleterious in the new host nuclear background, i.e.,  $F_A > F_B$ , a stable polymorphism might be  
1140 maintained for the alternative mtDNA haplotypes. The motivation was that imperfect maternal  
1141 transmission seemed analogous to migration introducing a deleterious allele into an “island” of  
1142 uninfected individuals. To refute this conjecture, consider the equilibria of (A1) with

1143

$$1144 \quad F_I > F_A \geq F_B. \quad (A4)$$

1145

1146 If all three cytotypes are to be stably maintained, we expect each to increase in frequency when  
 1147 rare. In particular, we expect the fitness-enhancing mtDNA haplotype A to increase when the  
 1148 population contains only infected individuals and uninfected individuals carrying the deleterious  
 1149 *Wolbachia*-associated mtDNA haplotype B. From (A1),  $p_{A,t}$  increases when rare if and only if

1150

$$1151 \quad F_A > \bar{F} = F_I p_{I,t} + F_B(1 - p_{I,t}). \quad (A5)$$

1152

1153 In the absence of haplotype A, we expect  $p_I$  to be at equilibrium between selection and imperfect  
 1154 maternal transmission, i.e.,

1155

$$1156 \quad p_I = 1 - \frac{\mu F}{F - 1}, \quad (A6)$$

1157

1158 with  $F = F_I/F_B$  (Hoffmann and Turelli 1997). Substituting (A6) into (A5) and simplifying, the  
 1159 condition for  $p_{A,t}$  to increase when rare is

1160

$$1161 \quad F_A(F_I - F_B) > F_I(1 - \mu)(F_I - F_B). \quad (A7)$$

1162

1163 By assumption (A4),  $F_I > F_B$ ; hence (A7) contradicts condition (A3), required for initial  
 1164 *Wolbachia* invasion. Thus, simple selection on *Wolbachia*-uninfected mtDNA haplotypes cannot  
 1165 stably maintain an mtDNA polymorphism. The “ancestral” mtDNA haplotype A is expected to  
 1166 be replaced by the less-fit *Wolbachia*-associated haplotype B.

1167 To understand the time scale over which this replacement occurs, let  $r_t$  denote the frequency  
 1168 of haplotype A among *Wolbachia*-uninfected individuals, i.e.,  $r_t = p_{A,t}/(p_{A,t} + p_{B,t})$ . From (A1),

1169

$$1170 \quad r_{t+1} = \frac{r_t F_A}{r_t F_A + (1 - r_t) F_B + \mu F_I [p_{I,t}/(1 - p_{I,t})]}. \quad (A8)$$

1171

1172 If we assume that the mtDNA haplotypes do not affect fitness, i.e.,  $F_A = F_B$ , and that the  
1173 *Wolbachia* infection frequency has reached the equilibrium described by (A6), (A8) reduces to

1174

$$1175 \quad r_{t+1} = r_t/[F(1 - \mu)], \quad (A9)$$

1176

1177 with  $F = F_I/F_B$ .

1178

1179

1180

1181

1182

1183

1184

1185

1186

1187

1188

1189

1190

1191

1192

1193

1194

1195

1196

1197

1198

1199

1200

1201

1202

1203 **SUPPLEMENTAL INFORMATION**

1204

1205 **Supplemental Tables**

1206

**Supplemental Table 1.** *w*Mau assembly statistics.

| <b>Genotype</b> | <b>Scaffold count</b> | <b>N50 (bp)</b> | <b>Longest scaffold (bp)</b> | <b>Total length (bp)</b> |
|-----------------|-----------------------|-----------------|------------------------------|--------------------------|
| <i>R9</i>       | 36                    | 60,027          | 169,305                      | 1,266,004                |
| <i>R29</i>      | 36                    | 61,106          | 169,295                      | 1,277,467                |
| <i>R31</i>      | 39                    | 63,676          | 169,381                      | 1,272,847                |
| <i>R41</i>      | 42                    | 61,106          | 170,537                      | 1,303,156                |
| <i>R60</i>      | 38                    | 63,156          | 221,751                      | 1,282,564                |

1207

1208

1209

**Supplemental Table 2.** Near-universal, single-copy proteobacteria genes (out of 221) found using BUSCO v. 3.0.0.

| <b>Genome</b> | <b>Complete</b> | <b>Duplicated</b> | <b>Fragment</b> | <b>Absent</b> |
|---------------|-----------------|-------------------|-----------------|---------------|
| <i>w</i> Ri   | 179             | 1                 | 2               | 39            |
| <i>w</i> Mel  | 179             | 1                 | 2               | 39            |
| <i>w</i> Au   | 180             | 1                 | 2               | 38            |
| <i>w</i> Ha   | 178             | 1                 | 3               | 39            |
| <i>w</i> No   | 180             | 1                 | 4               | 36            |
| <i>R9</i>     | 180             | 1                 | 4               | 36            |
| <i>R29</i>    | 180             | 1                 | 4               | 36            |
| <i>R31</i>    | 180             | 1                 | 4               | 36            |
| <i>R41</i>    | 180             | 1                 | 4               | 36            |
| <i>R60</i>    | 180             | 1                 | 4               | 36            |

1210



**Supplemental Table 3.** Copy number variants in *wMau* relative to sister *wNo*. Genomic positions are based on the *wNo* reference. There were no CNVs among *wMau* variants.

| Start     | End       | Change | Wilcoxon Rank Sum Test | Kolmogorov-Smirnov Test |
|-----------|-----------|--------|------------------------|-------------------------|
| 115,000   | 142,000   | 1 → 0  | < 0.0001               | < 0.0001                |
| 590,000   | 593,000   | 1 → 0  | 0.0027                 | 0.0050                  |
| 982,000   | 991,000   | 1 → 0  | < 0.0001               | < 0.0001                |
| 1,195,000 | 1,199,000 | 1 → 0  | 0.0005                 | 0.0007                  |

1211  
1212  
1213

**Supplemental Table 4:** Genes present in regions deleted in *wMau* relative to *wNo*. Genes predicted to be pseudogenized in *wNo* are shaded grey.

| Accession number                     | Name                                              |
|--------------------------------------|---------------------------------------------------|
| <b>Deletion 1 (115,000-142,000):</b> |                                                   |
| wNO_RS00550                          | Hypothetical protein                              |
| wNO_RS06015                          | Ankyrin repeat domain protein                     |
| wNO_RS00560                          | Pseudo IS256 family transposase, frameshifted     |
| wNO_RS00565                          | Recombinase family protein                        |
| wNO_RS00570                          | DUF2924 domain-containing protein                 |
| wNO_RS00575                          | Ankyrin repeat domain-containing protein          |
| wNO_RS00580                          | Ankyrin repeat domain-containing protein          |
| wNO_RS00585                          | Phage tail protein                                |
| wNO_RS00590                          | Baseplate assembly protein GpJ                    |
| wNO_RS00595                          | Pseudo baseplate assembly protein W, frameshifted |
| wNO_RS00600                          | Hypothetical protein                              |
| wNO_RS00605                          | Phage baseplate assembly protein V                |
| wNO_RS00610                          | Hypothetical protein                              |
| wNO_RS00615                          | Putative minor tail protein Z                     |
| wNO_RS00620                          | Hypothetical protein                              |
| wNO_RS00625                          | Minor capsid protein E                            |
| wNO_RS00630                          | Head decoration protein                           |
| wNO_RS00635                          | S49 family peptidase                              |

|                                          |                                                                  |
|------------------------------------------|------------------------------------------------------------------|
| wNO_RS00640                              | Pseudo phage portal protein, frameshifted                        |
| wNO_RS00645                              | Phage head stabilizing protein GpW                               |
| wNO_RS00650                              | Phage terminase large subunit family protein                     |
| wNO_RS00655                              | Ankyrin repeat domain-containing protein                         |
| wNO_RS00660                              | Hypothetical protein                                             |
| wNO_RS00665                              | Hypothetical protein                                             |
| wNO_RS00670                              | Sigma-70 family RNA polymerase sigma factor                      |
| wNO_RS00675                              | ATP-binding protein                                              |
| wNO_RS00680                              | IS110 family transposase                                         |
| <b>Deletion 2 (590,000-593,000):</b>     |                                                                  |
| wNO_RS02645                              | XRE family transcriptional regulator                             |
| wNO_RS02650                              | Hypothetical protein                                             |
| wNO_RS02655                              | Hypothetical protein                                             |
| wNO_RS02660                              | XRE family transcriptional regulator                             |
| <b>Deletion 3 (982,000-991,000):</b>     |                                                                  |
| wNO_RS04690                              | Group II intron reverse transcriptase/maturase                   |
| wNO_RS06355                              | Hypothetical protein                                             |
| wNO_RS04695                              | Pseudo hypothetical protein, partial                             |
| wNO_RS04700                              | Pseudo cell filamentation protein Fic, partial                   |
| wNO_RS04705                              | Hypothetical protein                                             |
| wNO_RS04710                              | DNA methylase                                                    |
| wNO_RS04715                              | Hypothetical protein                                             |
| wNO_RS04720                              | Ankyrin repeat domain-containing protein                         |
| wNO_RS04725                              | Phage terminase large subunit family protein                     |
| wNO_RS04730                              | Phage head stabilizing protein GpW                               |
| wNO_RS04735                              | DUF1016 domain-containing protein                                |
| <b>Deletion 4 (1,195,000-1,199,000):</b> |                                                                  |
| wNO_RS06095                              | Ankyrin repeat domain protein                                    |
| wNO_RS05590                              | Rpn family recombination-promoting nuclease/putative transposase |

1214

1215

**Supplemental Table 5.** *w*Mau does not significantly affect *D. mauritiana* fecundity in comparisons of paired infected (I) and uninfected (U) strains sharing host nuclear backgrounds. *N* is the number of females that produced the means and SDs. *P* values are for two-tailed Wilcoxon tests. Cytoplasm sources are denoted with superscripts for introgressed strains.

| Strain                    | Mean eggs laid/5 days | SD    | <i>N</i> | <i>P</i> value |
|---------------------------|-----------------------|-------|----------|----------------|
| <i>R3II</i>               | 210.97                | 55.22 | 30       | 0.901          |
| <i>R3IU</i>               | 213.50                | 58.43 | 28       |                |
| <i>R4II</i>               | 265.43                | 31.47 | 30       | 0.355          |
| <i>R4IU</i>               | 239.69                | 73.43 | 29       |                |
| <i>R3I<sup>R4I</sup>I</i> | 257.83                | 58.15 | 30       | 0.762          |
| <i>R3I<sup>R4I</sup>U</i> | 254.67                | 48.72 | 30       |                |
| <i>R4I<sup>R3I</sup>I</i> | 248.77                | 45.54 | 30       | 0.433          |
| <i>R4I<sup>R3I</sup>U</i> | 250.67                | 76.35 | 30       |                |

1216

1217

1218

1219

**Supplemental Figures**

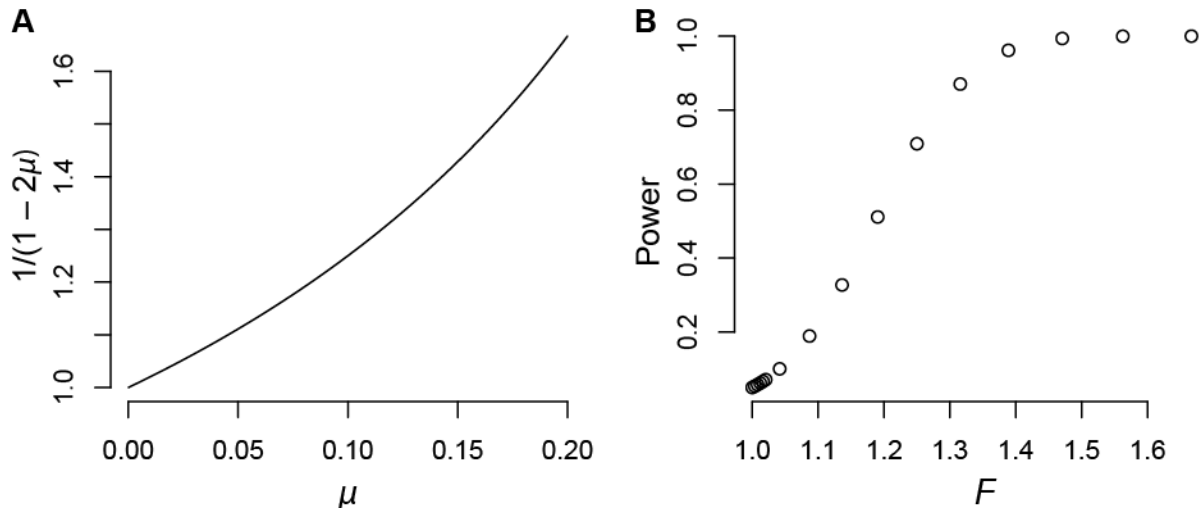

1220

1221

1222

1223

1224

1225

**Supplemental Figure 1.** A) Our proposed upper bound,  $1/(1 - 2\mu)$ , on plausible relative fitness, *F*, as a function of  $\mu$  ranging from perfect transmission ( $\mu = 0$ ) to a level of imperfect transmission ( $\mu = 0.2$ ) that has not been observed in nature. B) Our powers to detect values of *F* with  $\alpha = 0.05$ .
